1 **Structure-based identification of naphthoquinones and derivatives as**  
2 **novel inhibitors of main protease Mpro and papain-like protease**  
3 **PLpro of SARS-CoV-2**

4  
5 Lucianna H. Santos,<sup>a</sup> Thales Kronenberger,<sup>b,c</sup> Renata G. Almeida,<sup>d</sup> Elany B. Silva,<sup>e</sup>  
6 Rafael E. O. Rocha,<sup>a</sup> Joyce C. Oliveira,<sup>d</sup> Luiza V. Barreto,<sup>a</sup> Danielle Skinner,<sup>e</sup> Pavla  
7 Fajtová,<sup>e,f</sup> Miriam A. Giardini,<sup>e</sup> Brendon Woodworth,<sup>g</sup> Conner Bardine,<sup>h</sup> André Luiz  
8 Lourenço,<sup>h</sup> Charles S. Craik,<sup>h</sup> Antti Poso,<sup>b,c</sup> Larissa M. Podust,<sup>e</sup> James H. McKerrow,<sup>e</sup>  
9 Jair L. Siqueira-Neto,<sup>e</sup> Anthony J. O'Donoghue,<sup>e\*</sup> Eufrânio N. da Silva Júnior<sup>d\*</sup> and  
10 Rafaela S. Ferreira<sup>a\*</sup>

11  
12 <sup>a</sup>Department of Biochemistry and Immunology, Federal University of Minas Gerais,  
13 Belo Horizonte, 31270-901, Minas Gerais, Brazil;

14 <sup>b</sup>Department of Oncology and Pneumonology, Internal Medicine VIII, University  
15 Hospital Tübingen, Otfried-Müller-Straße 10, DE72076, Tübingen, Germany;

16 <sup>c</sup>School of Pharmacy, Faculty of Health Sciences, University of Eastern Finland, 70211,  
17 Kuopio, Finland.

18 <sup>d</sup>Institute of Exact Sciences, Department of Chemistry, Federal University of Minas  
19 Gerais, Belo Horizonte, 31270-901, Minas Gerais, Brazil;

20 <sup>e</sup>Skaggs School of Pharmacy and Pharmaceutical Sciences, University of California San  
21 Diego, 9500 Gilman Drive, La Jolla, CA 92093-0657, USA;

22 <sup>f</sup>Institute of Organic Chemistry and Biochemistry, Academy of Sciences of the Czech  
23 Republic, 16610 Prague, Czech Republic;

24 <sup>g</sup>Department of Medicine, Division of Infectious Diseases, University of California San  
25 Diego, La Jolla, CA 92093, USA.

26 <sup>h</sup>Department of Pharmaceutical Chemistry, University of California San Francisco, San  
27 Francisco, CA 94143, USA.

28  
29 Corresponding authors:

30 A. J. O'Donoghue, E-mail: [ajodonoghue@health.ucsd.edu](mailto:ajodonoghue@health.ucsd.edu); E. N. da Silva Júnior, E-  
31 mail: [eufranio@ufmg.br](mailto:eufranio@ufmg.br); R. S. Ferreira, E-mail: [rafaelasf@icb.ufmg.br](mailto:rafaelasf@icb.ufmg.br)

32  
33

34 **Abstract:** The worldwide COVID-19 pandemic caused by the coronavirus SARS-CoV-  
35 2 urgently demands novel direct antiviral treatments. The main protease (Mpro) and  
36 papain-like protease (PLpro) are attractive drug targets among coronaviruses due to their  
37 essential role in processing the polyproteins translated from the viral RNA. In the present  
38 work, we virtually screened 688 naphthoquinoidal compounds and derivatives against  
39 Mpro of SARS-CoV-2. Twenty-four derivatives were selected and evaluated in  
40 biochemical assays against Mpro using a novel fluorogenic substrate. In parallel, these  
41 compounds were also assayed with SARS-CoV-2 PLpro. Four compounds inhibited  
42 Mpro with half-maximal inhibitory concentration (IC<sub>50</sub>) values between 0.41 μM and 66  
43 μM. In addition, eight compounds inhibited PLpro with IC<sub>50</sub> ranging from 1.7 μM to 46  
44 μM. Molecular dynamics simulations suggest stable binding modes for Mpro inhibitors  
45 with frequent interactions with residues in the S1 and S2 pockets of the active site. For  
46 two PLpro inhibitors, interactions occur in the S3 and S4 pockets. In summary, our  
47 structure-based computational and biochemical approach identified novel  
48 naphthoquinonal scaffolds that can be further explored as SARS-CoV-2 antivirals.

49

50 **Keywords:** SARS-CoV-2, main protease, papain-like protease, naphthoquinoidal  
51 inhibitors, virtual screening, enzyme assays

52

---

Abbreviations:

SARS – severe acute respiratory syndrome; MERS – Middle East Respiratory Syndrome; Mpro – SARS-CoV-2 Main protease; PLpro – SARS-CoV-2 Papain-like protease; PCA – Principal Component Analysis; Hbond – Hydrogen bond; IC<sub>50</sub> – Half-maximal inhibitory concentration; MD – Molecular Dynamics; BL2 – Blocking Loop 2; RMSD – Root-Mean-Square Deviation

53

## 1. Introduction

54

55 COVID-19 is caused by a  $\beta$ -coronavirus that is related to the virus that was  
56 responsible for the severe acute respiratory syndrome (SARS) in 2003, and therefore  
57 designated SARS-CoV-2 [1]. In December 2019, the first cases of COVID-19 were  
58 reported in Wuhan, the capital of Hubei Province, China [2]. The new coronavirus  
59 showed a rapid geographical spread, associated with a high infection rate, and the World  
60 Health Organization (WHO) declared it as a pandemic on March 11, 2020 [3,4]. The rapid  
61 transmission from human to human is undoubtedly the main source of contagion, which  
62 occurs mainly through droplets, hand contact, or contact with contaminated surfaces [5].  
63 To control the spread of this pandemic virus, biosecurity and hygiene measures are now  
64 worldwide applied [6]. Despite the rapid development and emergency authorization of  
65 vaccines, viral escape mutants have emerged, and SARS-CoV-2 infections remain a  
66 concern for the global community. Therefore, there is a continuing need to discover  
67 structural frameworks for drugs that can be employed against COVID-19 [7].

68 Drug development efforts have targeted the SARS-CoV-2 main protease (Mpro)  
69 also known as 3-chymotrypsin-like protease (3CLpro) or non-structural protein 5 (nsp5)  
70 [8,9]. Mpro is an essential cysteine protease that cleaves the precursor replicase  
71 polyprotein in a coordinated manner [10], to generate at least 11 non-structural proteins  
72 [11]. As a target, Mpro is conserved among other coronaviruses, and has no closely  
73 related human homolog [12–14]. Therefore, it has been intensively investigated as a drug  
74 target for SARS and Middle East Respiratory Syndrome (MERS) [15–18]. Several Mpro  
75 inhibitors with *in vitro* antiviral activity against SARS-CoV-2 have been reported [19–  
76 25], including peptidomimetic aldehydes (best  $IC_{50}$  values ranging  $\sim 0.03$ - $0.05 \mu M$   
77 [19,21,23]),  $\alpha$ -ketoamides (best  $IC_{50}$  values ranging  $\sim 0.04$ - $0.67 \mu M$  [20,22]), calpain  
78 inhibitors (best  $IC_{50}$  values ranging  $\sim 0.45$ - $0.97 \mu M$  [20,23]), nonpeptidic inhibitors (best  
79  $IC_{50}$  values ranging  $\sim 0.17$ - $0.25 \mu M$  [24–26]). The binding modes of dozens of these  
80 inhibitors have been determined by crystallography [20,22–29]. Recently, a covalent  
81 reversible nitrile was reported as an orally bioavailable Mpro inhibitor with *in vitro* and  
82 *in vivo* antiviral activity [30], and shown to reduce hospitalizations in COVID-19 patients  
83 by 89% [31]. Coronaviruses also encode a second cysteine protease, PLpro, that plays an  
84 essential role in suppression of the host immune system [32–34]. PLpro can hydrolyze  
85 ubiquitin and interferon-induced gene 15 (ISG15) from host proteins which allows the  
86 virus to evade the host innate immune responses [10,35]. This enzyme also cleaves the

87 viral polypeptide to release the nsp1, nsp2 and nsp3 proteins [36]. SARS-CoV-2 PLpro  
88 inhibitors with antiviral efficacy have been described [37–40], including naphthalene-  
89 based ( $EC_{50}$  values of 1.4 to 21  $\mu$ M for antiviral activity and  $IC_{50}$  values of 0.18 to 43.2  
90  $\mu$ M against the enzyme [37–39]) and 2-phenylthiophene-based ( $EC_{50}$  values of 2.5 to 11.3  
91  $\mu$ M for antiviral activity and  $IC_{50}$  values of 0.11 to 0.56  $\mu$ M against the enzyme [40])  
92 non-covalent compounds, and 21 crystallographic structures of this protease complexed  
93 with a ligand are available [8,37–42]. The crystal structures of Mpro and PLpro with  
94 bound ligands provided us with a structural basis to identify novel inhibitors.

95 Repurposing existing chemical libraries is a promising strategy to quickly  
96 discover novel therapies [43,44]. Several newly discovered therapies for treatment of  
97 COVID-19 infection are derived from approved drugs, clinical candidates, and other  
98 pharmacologically active compounds that were originally developed for other indications  
99 [45–48]. In addition, knowledge gained from previous outbreaks of SARS, MERS, and  
100 bat coronavirus (BatCoV-RaTG13) have facilitated the rapid discovery of SARS-CoV-2  
101 drugs [2,6,49]. Remdesivir, a broad-spectrum viral RNA-dependent RNA polymerase  
102 (RdRp) inhibitor [50,51], was rapidly approved for treatment of hospitalized patients with  
103 COVID-19 [52], which has resulted in a more rapid recovery of patients and lower levels  
104 of airway infection [53]. Drugs that provide either symptom relief for patients or have not  
105 been scientifically proven to be effective are also being widely studied by the scientific  
106 community [54].

107 Embelin, a natural product with a quinone core, has antiviral activity against  
108 influenza and hepatitis B [55,56]. Recently, it was shown that Embelin may inhibit Mpro  
109 and therefore have potential to be used as a treatment of SARS-CoV-2 [57]. In addition  
110 to Embelin, other studies showed that molecules containing a quinoidal framework also  
111 had inhibitory activity against SARS-CoV-2 Mpro. These included celastrol, pristimerin,  
112 tingenone and iguesterin [58]. We have experience working with naphthoquinones and  
113 therefore searched for structures with potential activity against SARS-CoV-2. In this  
114 report, we outline an *in silico* screening of a library of 688 quinonoid compounds and  
115 derivatives against SARS-CoV-2 Mpro, from which 24 compounds were selected and  
116 tested against this protease. Based on this strategy, and on experimental screening against  
117 PLpro as well, we report novel naphthoquinoidal inhibitors of both SARS-CoV-2  
118 proteases. In addition to biochemical validation, molecular dynamics (MD) simulations  
119 indicated the stability of the Mpro and PLpro quinoidal complexes binding modes,  
120 mediated by interactions that were also frequently found in crystallographic complexes

121 of the proteases. The quinones are promising COVID-19 drug candidates to be further  
122 explored, while also offering valuable insights into Mpro and PLpro inhibition.

123

124

## 2. Results

125

### 2.1. Assembly of a chemical library for virtual screening against Mpro

126

127 To search for potential Mpro inhibitors, we retrieved a library of quinones and  
128 their derivatives, as detailed in **Figures 1** and **2** (See the Supporting Information **Figures**  
129 **S1-S40**, for more structural information). Six hundred and eighty-eight compounds were  
130 considered for virtual screening by molecular docking. We divided the molecules into  
131 eight different groups as described in **Figure 1** (Groups 1-4) and **Figure 2** (Groups 5-8).  
132 The compounds listed in Group 1 are *ortho*-quinones with different substitution patterns.  
133 In general, we evaluated compounds containing arylamino [59–64], alcohol [60] and  
134 alkoxy groups [61,62], selenium and sulfur [65–67], the basic chalcone framework [68],  
135 among simple *ortho*-quinones [61,68–71].

136

137 Group 2 is composed of *para*-quinones. We studied compounds such as  $\alpha$ -  
138 lapachones [60,72], arylamino derivatives [60,64,71], furanonaphthoquinones [73–75],  
139 and pyrrolonaphthoquinones [73,76], in addition to other derivatives based on *para*-  
140 quinones [64,75]. The selected compounds for this group exhibit a broad substitution  
141 pattern but, in general, arylamino and aryl groups are often observed. Compounds with  
142 antiviral activity containing the *para*-quinone core are frequently described in the  
143 literature [77–79].

143

144 Groups 3 and 4 consist of *ortho*- and *para*-quinones with a 1,2,3-triazole nucleus.  
145 Lapachone-based 1,2,3-triazoles have been studied because of their broad spectrum of  
146 biological activities. We studied compounds with aromatic and aliphatic substituents  
147 [61,71,80–86], the presence of selenium [64,87], BODIPY [88,89], and sugars [71],  
148 among other substituent groups in the present quinoid structure [45,90–93].

148

149 The phenazine form of the triazole compounds and quinones described in groups  
150 1 and 3 were also evaluated in group 5 [94–97]. Group 6 is the most complete and diverse  
151 group addressed in this study, containing approximately two hundred 1,4-  
152 naphthoquinones with broad substitution patterns in the benzenoid A-ring and B-ring.  
153 Compounds containing sulfur, as sulfoxides and sulfones [98,99], selenium [100], iodine  
[47], amines, bromine, hydroxyls, alkenes, among other substituent groups [46,101–107]

154 were studied and evaluated according to their potential to act as anti-SARS-CoV-2. Imine  
155 derivatives were also targeted in our studies and were placed in group 6 [67].

156 Finally, groups 7 and 8 are formed by hydrazo, imidazole, and oxazole derivatives  
157 [108–111]. The compounds in these groups were prepared from the quinones described  
158 above and represent our attempt to study quinone-derived heterocyclic compounds with  
159 biological activity against various microorganisms and their effectiveness against the  
160 virus that causes COVID-19.

**Group 1: Ortho-quinones**

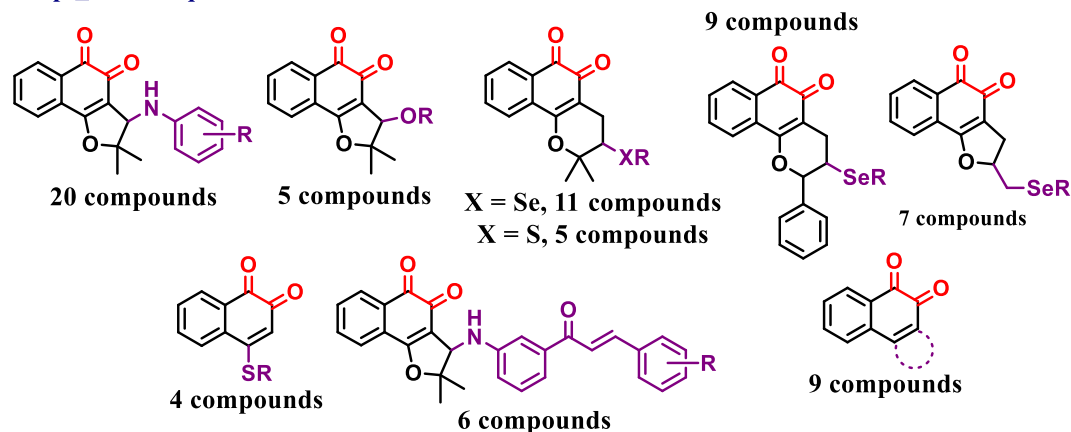

**Group 2: Para-quinones**

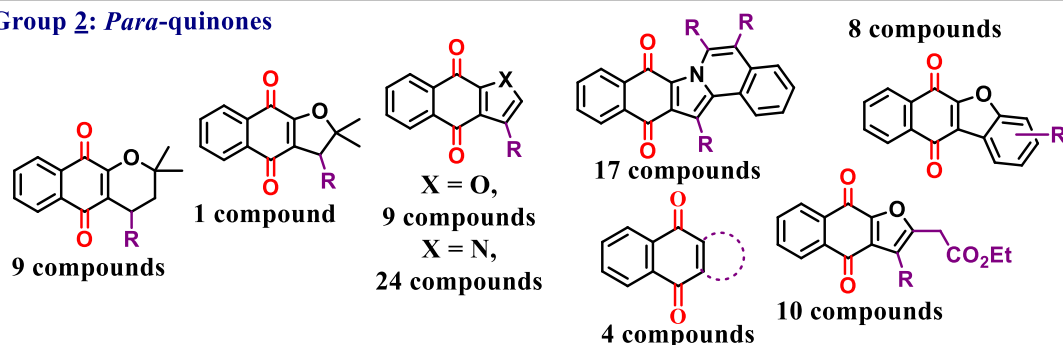

**Group 3: Ortho-quinone-based 1,2,3-triazoles**

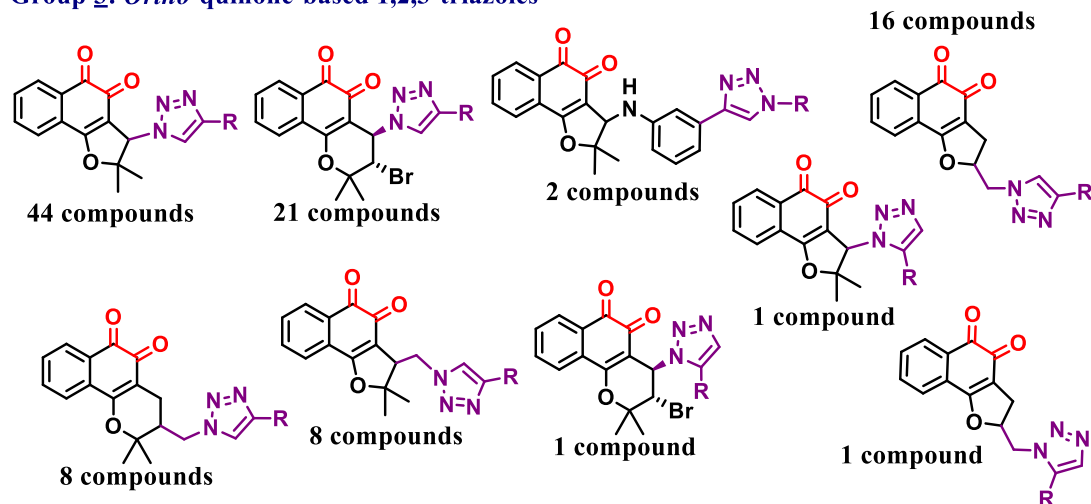

**Group 4: Para-quinone-based 1,2,3-triazoles**

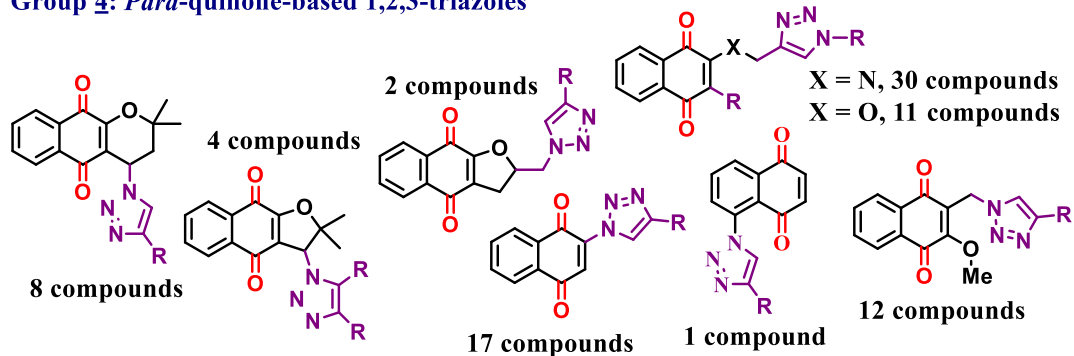

161

162

**Figure 1.** The basic structural framework of the compounds listed in Groups 1-4.

**Group 5: phenazine derivatives**

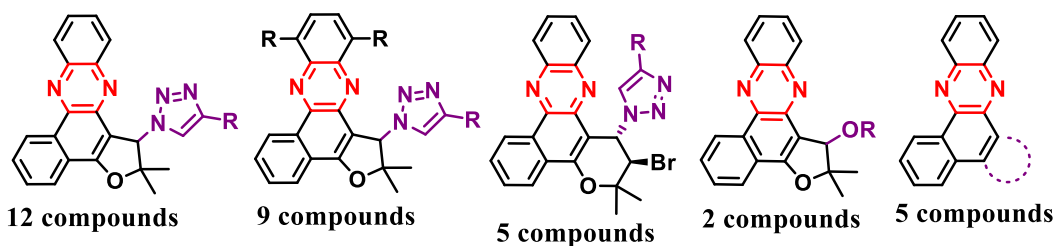

**Group 6: 1,4-naphthoquinones and derivatives**

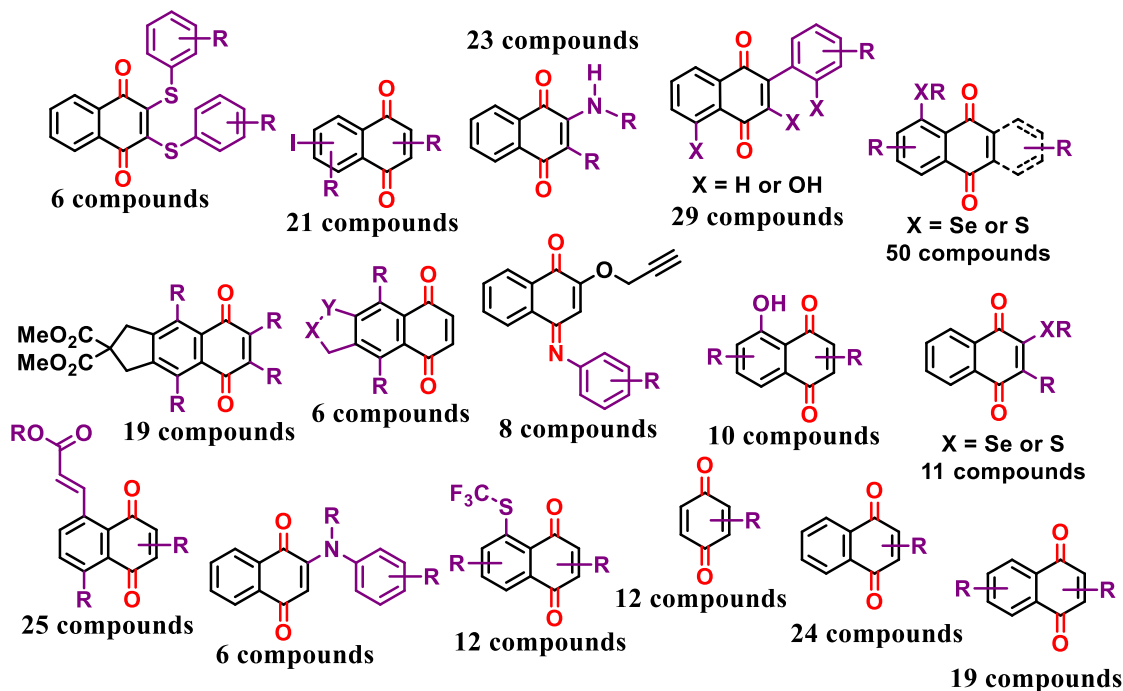

**Group 7: hydrazo derivatives**

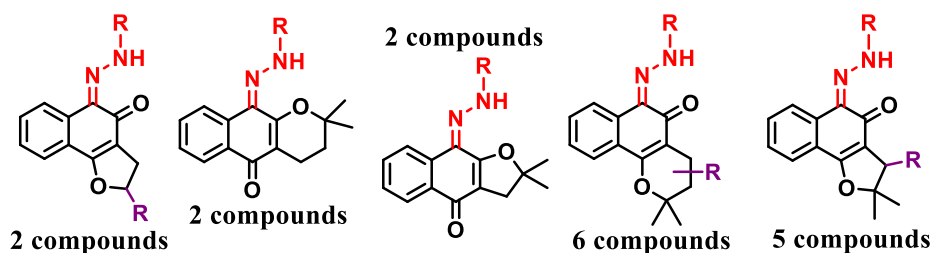

**Group 8: Imidazole and oxazole derivatives**

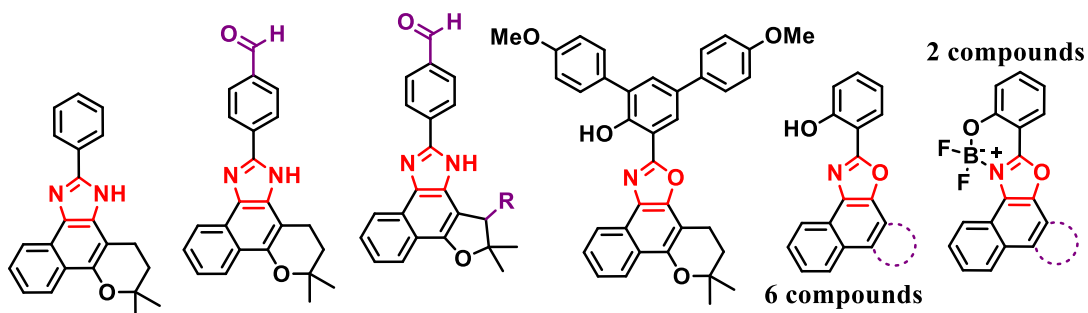

163

164

**Figure 2.** The basic structural framework of the compounds listed in Groups 5-8.



## 165 **2.2. Available Mpro structures show conserved conformation, protein-ligand** 166 **interactions, and location of waters molecules**

167  
168 As an initial investigation to support the virtual screening of the quinoidal library,  
169 we analyzed 72 Mpro structures with bound ligands that have a resolution of 1.3 Å to 2.5  
170 Å (Supporting Information **Figure S41B**). Active Mpro forms a homodimer comprising  
171 two protomers [19], while its monomer is inactive [112]. Each protomer is formed by  
172 domains I, II, and III, binding to each other by an *N*-terminal finger between domains II  
173 and III [24] (**Figure 3**). The substrate-binding site is located in a cleft between domains I  
174 and II and covered by a loop connecting them. Also crucial to the formation of the active  
175 dimer, the *N*-terminal finger of one monomer extends to the other monomer, shaping and  
176 forming the active substrate-binding site [22]. The substrate-binding cleft is composed of  
177 four subsites S1', S1, S2, and S4 [14,19], which features a non-canonical Cys-His  
178 catalytic dyad [19,24] (**Figure 3**).

179 Using principal component analysis (PCA) to assess conformational differences  
180 among the structures, we found a high similarity among the Mpro structures evaluated.  
181 Even for the four most divergent structures (PDB codes: 6M2N [113], 6W63 [114], 6LU7  
182 [24], and 7BQY [24], Supporting Information **Figure S41A**), carbon alpha (C $\alpha$ ) root-  
183 mean-square deviation (RMSD) between the protease structures is less than 1.0 Å  
184 (Supporting Information **Figure S41B**), suggesting high overall conservation of the  
185 quaternary structure.

186 On the other hand, the Mpro active site is known for its high flexibility with  
187 conformational changes induced by ligand binding [24,115,116]. Thus, to evaluate  
188 possible differences in active site residue conformations, we superimposed six high-  
189 resolution Mpro structures (1.31 Å to 1.51 Å, PDB codes 5R82, 5RFW, 5RF6, 5RFE,  
190 5RFV, and 5RF3 [117]) with four structures that were discovered to have lower structural  
191 similarity by PCA and had resolutions between 2.10 Å and 2.20 Å. The superposition of  
192 these structures reveals that most residues in the ligand-binding site adopt similar  
193 conformations (Supporting Information **Figure S42**), except for M<sub>49</sub>, N<sub>142</sub>, M<sub>165</sub>, and  
194 Q<sub>189</sub>, which were the most flexible among the other binding site residues.

195

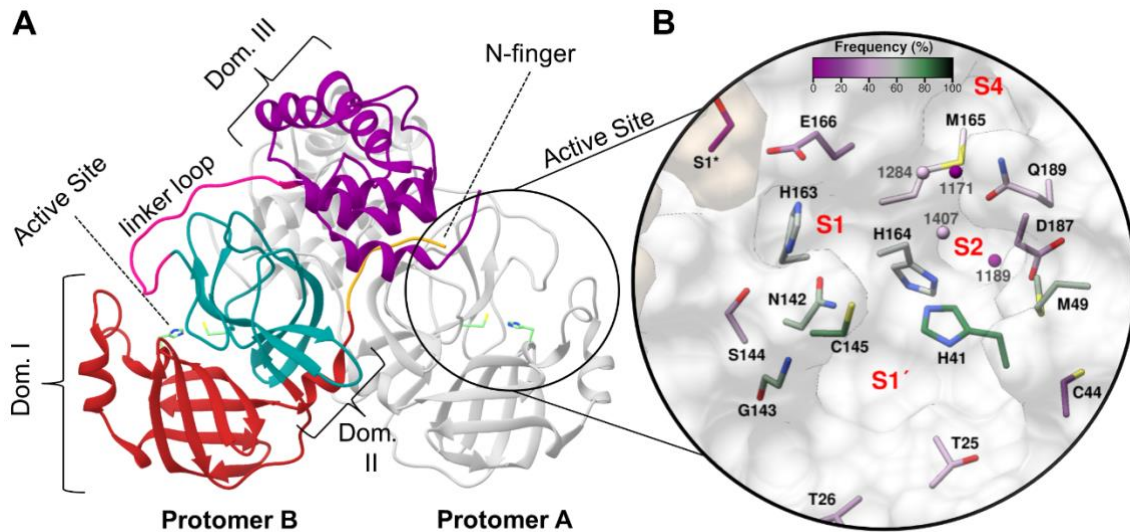

196

197 **Figure 3.** Three-dimensional structure of Mpro dimer (PDB code: 5R82 [117]) and  
198 surface view of the active site. Protomer A is shown in gray, and protomer B is colored  
199 according to three domains: red for domain I, blue for domain II, and purple for domain  
200 III. The loop linking domains II and III, critical for the protein dimerization, is colored in  
201 pink and the *N*-terminal finger colored orange (A). The substrate-binding cleft is  
202 highlighted with the catalytic residues H<sub>41</sub> and C<sub>145</sub> displayed as sticks (B). In the close-  
203 up view of the active site, the residues and conserved water molecules are colored by the  
204 frequency they are involved in interactions with 72 crystallography ligands, according to  
205 an analysis using the program LUNA (<https://github.com/keiserlab/LUNA>).

206

207 To better understand the molecular recognition between Mpro and inhibitors, we  
208 assessed the common protein-ligand interactions found in the 72 experimentally  
209 determined crystal structures, of which 49 displayed covalent and 23 non-covalent  
210 ligands, using the program LUNA (<https://github.com/keiserlab/LUNA>). Within this  
211 comprehensive set, ligands interacted most frequently with the catalytic dyad and residues  
212 in the S1 and S2 pockets (**Figure 3B**). For the catalytic dyad, C<sub>145</sub> interacts with 78% of  
213 the ligands, forming hydrophobic and hydrogen bond interactions, while H<sub>41</sub> binds to 82%  
214 of the inhibitors, mostly through aromatic stacking, hydrophobic, cation- $\pi$ , and weak  
215 hydrogen bond interactions (**Figure 3B** and **4A**). Within the S1 pocket, polar protein-  
216 ligand interactions were enriched such as hydrogen bonds and hydrophobic interactions  
217 with G<sub>143</sub> (68% interaction frequency); hydrophobic interactions and weak hydrogen  
218 bonds with N<sub>142</sub> (65% interaction frequency); and cation-nucleophile, cation- $\pi$ , and

219 hydrogen bond interactions with H<sub>163</sub> (58% interaction frequency). S<sub>144</sub> (35%) and E<sub>166</sub>  
220 (29%) in the S1 pocket and D<sub>187</sub> (33%), and C<sub>44</sub> (21%) in S2 had lower frequency of  
221 interactions (**Figure 3B** and **4A**). On the other hand, the S2 subsite is more hydrophobic.  
222 The two residues with the highest interaction frequencies from this pocket were M<sub>49</sub>  
223 (65%) and H<sub>164</sub> (58%) which formed hydrophobic and weak hydrogen bond interactions,  
224 while M<sub>165</sub> (47%) and Q<sub>189</sub> (43%) interacted mainly by hydrophobic contacts with the  
225 ligands (**Figure 3B** and **4A**). The high frequency of interactions with S1 and S2 residues  
226 showed that most of the ligands fill one or both pockets, conserving a more polar profile  
227 for S1, whereas the S2 retained a more aromatic and aliphatic profile as observed  
228 previously with the SARS-CoV Mpro [118] and in other studies with SARS-CoV-2 Mpro  
229 [119,120].

230         Additionally, two S1' residues, T<sub>25</sub> (39%) and T<sub>26</sub> (35%), displayed frequent  
231 hydrophobic and weak hydrogen bond interactions. Amino acids in more solvent-exposed  
232 pockets, such as S1' residues L<sub>27</sub> (13%) and T<sub>24</sub> (3%), and S4 residues retained few or no  
233 interactions (**Figure 4A**). Several of the hydrogen bond interactions found by Luna were  
234 mediated by water, meaning ligand and protein residue are bridged by a solvent molecule.  
235 In Mpro, water molecules contribute to ligand stabilization by forming water-mediated  
236 hydrogen bonds [19,20,24] and act as a possible third element to the catalytic dyad  
237 [9,121,122]. Therefore, we investigated which waters are conserved among the chosen  
238 Mpro structures using the ProBiS H<sub>2</sub>O plugin [123]. We found four conserved water  
239 molecules (present in over 50% of the structures, **Figure 3** and Supporting Information  
240 **Table S1**), that interacted with 20-45% of the ligands, displaying van der Waals,  
241 hydrogen bond, and weak hydrogen bond interactions (**Figure 4A**). Thus, these  
242 crystallographic conserved and buried water molecules might be important for ligand  
243 recognition.

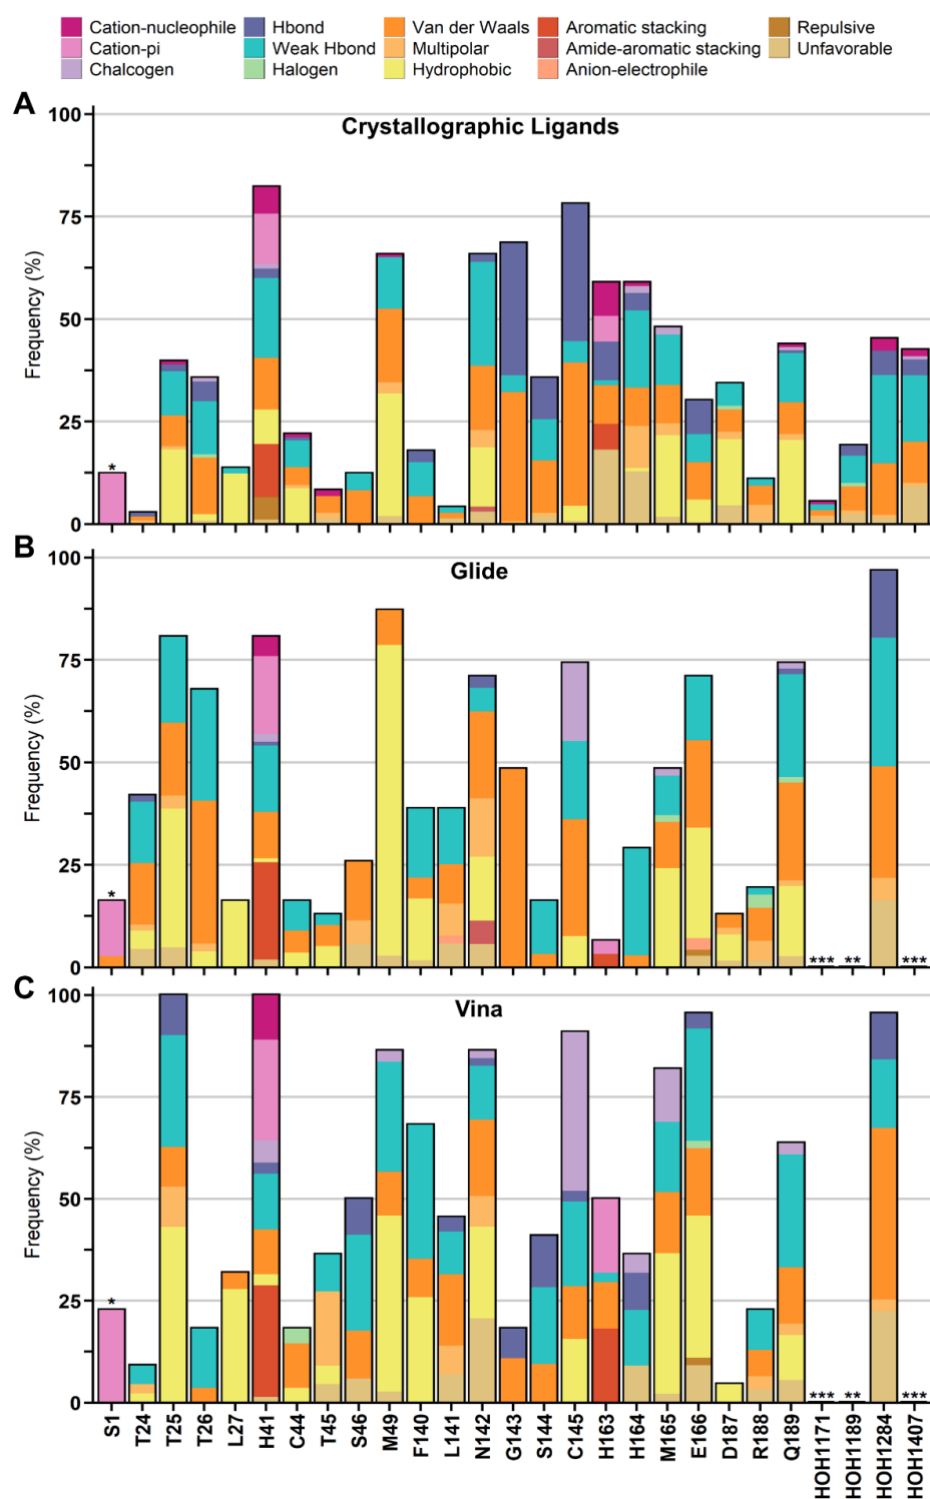

244

245 **Figure 4.** Interaction analysis between Mpro binding site residues and ligands from  
 246 crystallographic structures and docking with Glide and Vina. Frequency and interaction  
 247 types between residues and 72 crystallographic ligands (A), the final 24 selected  
 248 compounds for biochemical assays from both Glide (B) and Vina (C). Residues with (\*)  
 249 are from the other protomer. From docking results, the (\*\*) highlight residues with no  
 250 interactions, while (\*\*\*) are residues that were not considered in the docking calculations.

251

### 252 **2.3. Virtual screening of naphthoquinoidal compounds against SARS-CoV-2 main** 253 **protease**

254

255 Considering the high conservation within the Mpro crystal structure  
256 conformations, we performed initial molecular docking experiments with the highest-  
257 resolution structure (1.31 Å – PDB Code 5R82 [117]) from the most populated of the  
258 structural clusters, followed by a second round of flexible docking with compounds  
259 prioritized from rigid docking. Due to the importance of water molecules in the ligand  
260 binding site, we retained two of the four conserved water molecules, that may mediate  
261 hydrogen bonds with H<sub>41</sub>, C<sub>145</sub>, E<sub>166</sub>, and L<sub>167</sub>, for molecular docking (**Figure 4A** and  
262 Supporting Information **Table S1**). To account for the possibility of water displacement  
263 by ligands, a second Mpro preparation was also performed in the absence of water  
264 molecules. Both preparations were submitted to two distinct docking algorithms, Glide  
265 [124] and Autodock Vina [125].

266 Docking results were visually inspected and relevant poses were selected  
267 according to their overall binding site complementarity and specific protein-ligand  
268 interactions. Thus, we prioritized 70 compounds that interacted with the previously  
269 established high frequent residues, H<sub>41</sub>, M<sub>49</sub>, N<sub>142</sub>, G<sub>143</sub>, C<sub>145</sub>, M<sub>165</sub>, Q<sub>189</sub>, and water  
270 molecules for flexible docking approaches. Overall, Glide and Vina docking modes  
271 established contacts with S1', S1, and S2 residues. However, a slight shift in interaction  
272 patterns was found. Compounds from the quinoidal library did not establish as many  
273 hydrogen bond interactions as the crystallographic ligands, giving a more hydrophobic  
274 nature to the interactions (**Figures 4B/C** and Supporting Information **Figure S43**).

275 In the second round of docking, we treated M<sub>49</sub>, N<sub>142</sub>, M<sub>165</sub>, and E<sub>189</sub> as flexible  
276 residues, as these were most flexible within crystal structures analyzed and interacted  
277 with a high number of ligands (40-65%). Based on these results, we selected 24 (out of  
278 70) compounds that matched the desired residue interactions (**Figure 4B** and **C**) and  
279 maintained good complementarity to the binding site (Supporting Information **Figures**  
280 **S44** to **S47**), for experimental validation in biochemical assays. The compounds selected  
281 represent diverse scaffolds from our library, comprising *ortho*-quinone-based 1,2,3  
282 triazoles (group 3), *para*-quinone-based 1,2,3 triazoles (group 4), 1,4-naphthoquinones  
283 (group 6), and hydrazo derivatives (group 7).

284

## 285 **2.4. Design and validation of Mpro substrate**

286

287 Prior to biochemically evaluating the compounds against Mpro, we designed a  
288 fluorescent-quenched peptide substrate with the sequence ATLQAIAS that corresponds  
289 to the P4 to P4' amino acids of the nsp7-nsp8 cleavage site and the dash representing the  
290 scissile bond. This substrate was chosen because the sequence most closely matches the  
291 consensus sequence for all 11 viral polypeptide cleavage sites (**Figure 5A and B**) [126].  
292 ATLQAIAS was flanked by 7-methoxycoumarin-4-acetyl-L-lysine on the N-terminus,  
293 dinitrophenyl-L-lysine on the C-terminus. The peptide contains several non-polar amino  
294 acid residues and therefore two d-Arginine residues were added on the N-terminus to  
295 increase solubility. Using a concentration range of 3  $\mu\text{M}$  to 250  $\mu\text{M}$ , the  $K_M$  for this  
296 substrate was calculated to be  $52.1 \mu\text{M} \pm 14.4 \mu\text{M}$ .

297

## 298 **2.5. Validation of novel Mpro inhibitors**

299

300 We evaluated the 24 hit compounds from our virtual screen in a biochemical assay  
301 using recombinant SARS-CoV-2 Mpro. The enzyme was pre-incubated with each  
302 compound at 10  $\mu\text{M}$  and then assayed with the fluorogenic peptide substrate. To avoid  
303 detecting aggregators as false positives [127,128], our assay was performed in the  
304 presence of 0.01% Tween 20. Additionally, we evaluated the absorbance of MCA  
305 fluorescence by the compounds, to make sure the observed enzyme inhibition was not an  
306 artifact of fluorescence, another common cause of false positives in enzyme assays [129].  
307 From this screen, three 1,4-naphthoquinones derivatives, **379**, **382**, and **415**, fully  
308 inhibited Mpro, while two quinone-based 1,2,3 triazoles, **191** and **194**, had 50% or more  
309 inhibition. **668** was insoluble in assay buffer and was therefore eliminated from further  
310 analysis, while the remaining compounds had inhibition profiles of less than 50% (**Table**  
311 **1**). The most potent compounds were subsequently evaluated at a concentration range of  
312 10  $\mu\text{M}$  to 9.7 nM and the half-maximal inhibitory concentration ( $IC_{50}$ ) was calculated to  
313 be  $66 \mu\text{M} \pm 22$  for **191**, an *ortho*-quinone-based 1,2,3 triazole,  $5 \mu\text{M} \pm 0.15$  for **415**,  $0.63$   
314  $\mu\text{M} \pm 0.04$  for **379**, and  $0.41 \mu\text{M} \pm 0.015$  for **382** (**Table 1** and **Figure 5**).

315

316

317

318  
319

**Table 1.** Percentage of inhibition at 10  $\mu\text{M}$  and  $\text{IC}_{50}$  for naphthoquinoidal compounds against SARS-CoV-2 Mpro and PLpro.

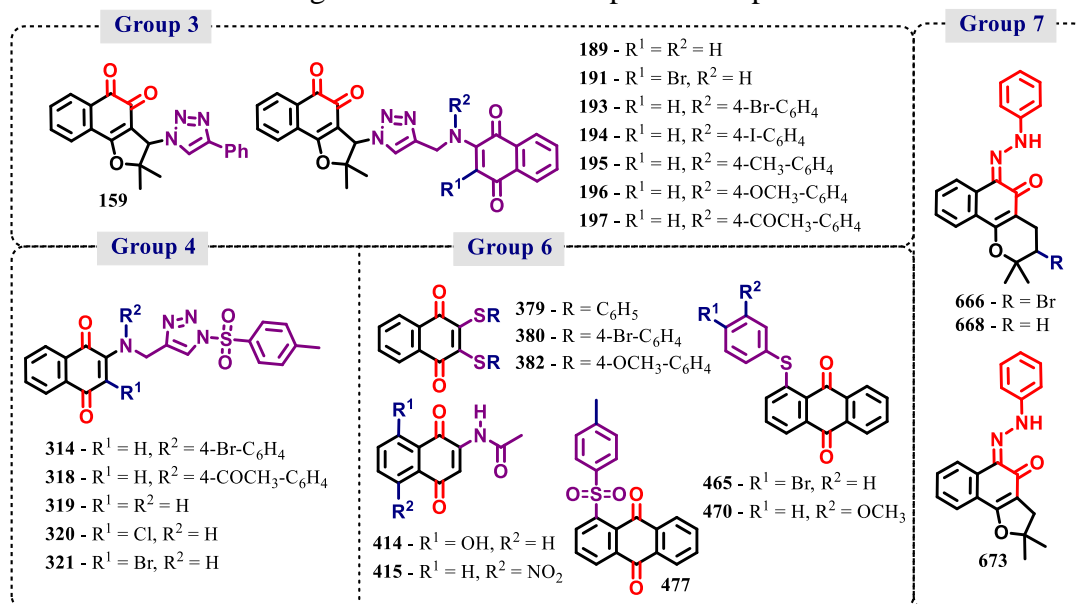

320

| Compound <sup>a</sup> | Mpro                                          |                                                 | PLpro                                         |                                                 |
|-----------------------|-----------------------------------------------|-------------------------------------------------|-----------------------------------------------|-------------------------------------------------|
|                       | % inhibition at 10 $\mu\text{M}$ <sup>b</sup> | $\text{IC}_{50}$ ( $\mu\text{M}$ ) <sup>c</sup> | % inhibition at 10 $\mu\text{M}$ <sup>b</sup> | $\text{IC}_{50}$ ( $\mu\text{M}$ ) <sup>c</sup> |
| 159                   | 35 $\pm$ 1                                    | ND                                              | 100 $\pm$ 1                                   | 1.7 $\pm$ 0.1                                   |
| 189                   | 25 $\pm$ 2                                    | ND                                              | 100 $\pm$ 0                                   | 2.2 $\pm$ 0.2                                   |
| 191                   | 55 $\pm$ 3                                    | 66 $\pm$ 20                                     | 93 $\pm$ 0.7                                  | 3.1 $\pm$ 0.9                                   |
| 193                   | 32 $\pm$ 1                                    | ND                                              | 76 $\pm$ 1                                    | 46.5 $\pm$ 5                                    |
| 194                   | 50 $\pm$ 7                                    | ND                                              | 78 $\pm$ 5                                    | 29 $\pm$ 4                                      |
| 195                   | 40 $\pm$ 2                                    | ND                                              | 80 $\pm$ 2                                    | 33.5 $\pm$ 4                                    |
| 196                   | 29 $\pm$ 2                                    | ND                                              | 89 $\pm$ 2                                    | 22.5 $\pm$ 5                                    |
| 197                   | 18 $\pm$ 4                                    | ND                                              | 80 $\pm$ 2                                    | 20.5 $\pm$ 2                                    |
| 314                   | 36 $\pm$ 2                                    | ND                                              | 55 $\pm$ 7                                    | ND                                              |
| 318                   | 45 $\pm$ 13                                   | ND                                              | 9 $\pm$ 5                                     | ND                                              |
| 319                   | 5 $\pm$ 2                                     | ND                                              | 69 $\pm$ 3                                    | ND                                              |
| 320                   | 11 $\pm$ 6                                    | ND                                              | 31 $\pm$ 6                                    | ND                                              |
| 321                   | 40 $\pm$ 8                                    | ND                                              | 17 $\pm$ 0.2                                  | ND                                              |
| 379                   | 100 $\pm$ 0                                   | 0.63 $\pm$ 0.04                                 | 0 $\pm$ 0                                     | ND                                              |
| 380                   | 12 $\pm$ 3                                    | ND                                              | 12 $\pm$ 6                                    | ND                                              |
| 382                   | 100 $\pm$ 0                                   | 0.41 $\pm$ 0.02                                 | 0 $\pm$ 0                                     | ND                                              |
| 414                   | 29 $\pm$ 2                                    | ND                                              | 38 $\pm$ 2                                    | ND                                              |
| 415                   | 100 $\pm$ 0                                   | 5 $\pm$ 0.2                                     | 63 $\pm$ 9                                    | ND                                              |
| 465                   | 3 $\pm$ 5                                     | ND                                              | 0 $\pm$ 0                                     | ND                                              |
| 470                   | 1 $\pm$ 2                                     | ND                                              | 6 $\pm$ 0                                     | ND                                              |
| 477                   | 5 $\pm$ 2                                     | ND                                              | 0 $\pm$ 0                                     | ND                                              |
| 666                   | 5 $\pm$ 5                                     | ND                                              | 0 $\pm$ 0                                     | ND                                              |
| 668                   | NT                                            | NT                                              | NT                                            | NT                                              |
| 673                   | 8 $\pm$ 3                                     | ND                                              | 4 $\pm$ 4                                     | ND                                              |

321

322 <sup>a</sup>See Supporting Information File for all structures. <sup>b</sup>Percentages of inhibition are reported  
 323 as averages and standard deviation of the mean calculated from one experiment  
 324 performed in triplicate. Compounds were pre-incubated with enzymes for 15 min before  
 325 addition of the substrate. <sup>c</sup> $\text{IC}_{50}$  values are reported as the averages and standard deviation  
 326 of the mean, based on two independent experiments. Each  $\text{IC}_{50}$  curve was determined  
 327 based on at least 7 compound concentrations in triplicate. ND: not determined. NT: not  
 328 tested.

329

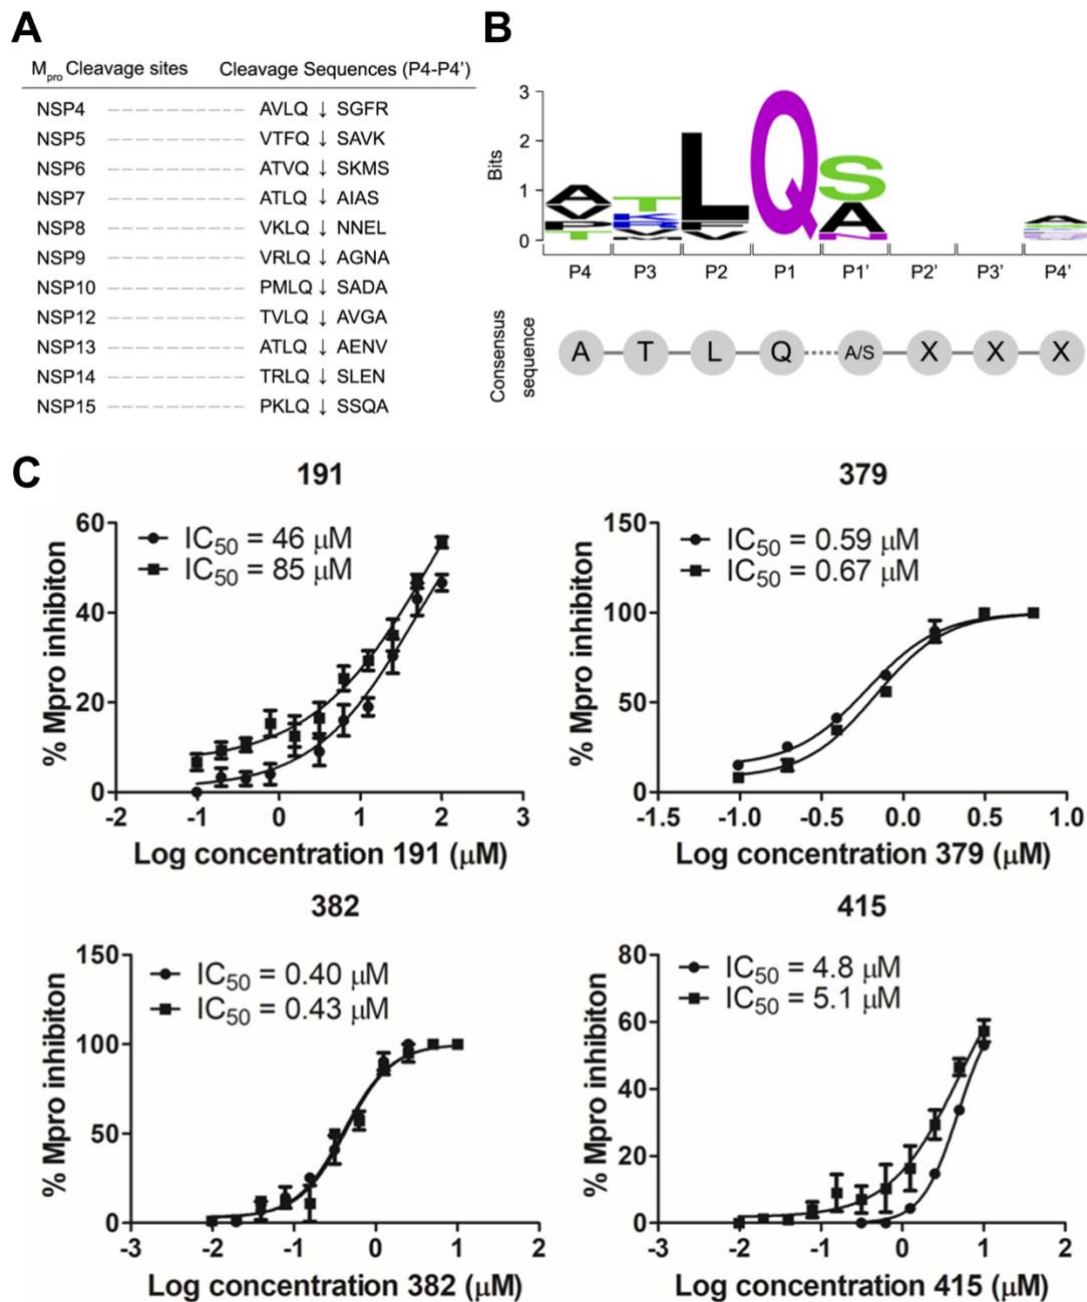

330

331

332 **Figure 5. Validation of SARS-CoV-2 Mpro inhibitors in enzyme assays.** List of the  
 333 11 Mpro cleavage sites (A) and the design of a fluorescent-quenched peptide substrate  
 334 (B). The ATLQAIAS substrate was chosen since it closely matches the consensus  
 335 sequence of all 11 viral polypeptide cleavage sites. IC<sub>50</sub> curves for SARS-CoV-2 Mpro  
 336 inhibitors (C). For each compound, two IC<sub>50</sub> curves are shown, corresponding to two  
 337 independent experiments (data shown as spheres or squares for each experiment), in  
 338 which the compounds were pre-incubated with Mpro prior to substrate addition. Each  
 339 curve was determined based on at least 7 compound concentrations in triplicate.



340

341 To better understand the mechanism of Mpro inhibition by naphthoquinone-based  
342 derivatives, we evaluated whether compounds **382** and **415** were time-dependent  
343 inhibitors, a hallmark of covalent-acting molecules. First, enzyme inhibition after 15 min  
344 preincubation with the compounds was compared to activity without preincubation [130].  
345 The IC<sub>50</sub> values observed in these two assay conditions were similar, with slightly lower  
346 IC<sub>50</sub> values upon preincubation (0.42 μM ± 0.02 upon incubation vs 0.80 μM ± 0.06  
347 without incubation for **382** and 5.0 μM ± 0.2 upon incubation vs 16 μM ± 1 without  
348 incubation for **415**) (**Figure 6A** and **B**), while for the positive control GC373 the IC<sub>50</sub> was  
349 ten-fold lower upon preincubation (0.003 μM ± 0.001). A dilution experiment was also  
350 performed, to check whether the compounds were irreversible. We incubated the  
351 inhibitors and Mpro at high concentrations and then diluted the incubation mixture,  
352 resulting in inhibitor concentrations 10-fold lower than their apparent IC<sub>50</sub>. In this assay,  
353 an irreversible inhibitor will maintain approximately 10% of enzymatic activity, while a  
354 rapidly reversible inhibitor will dissociate from the enzyme to restore approximately 90%  
355 of enzymatic activity following the dilution event [130,131]. When this was performed  
356 with Mpro and GC373, a covalent Mpro inhibitor, the enzyme remained inhibited upon  
357 dilution. The same behavior was observed for compound **415** suggesting that this  
358 inhibitor is an irreversible covalent inhibitor (see **Figure 7** for the proposed binding  
359 mechanism). However, when the same test was carried out with compound **382** enzyme  
360 activity returned after dilution (**Figure 6C**). This suggested that the inhibition by **382** is  
361 reversible.

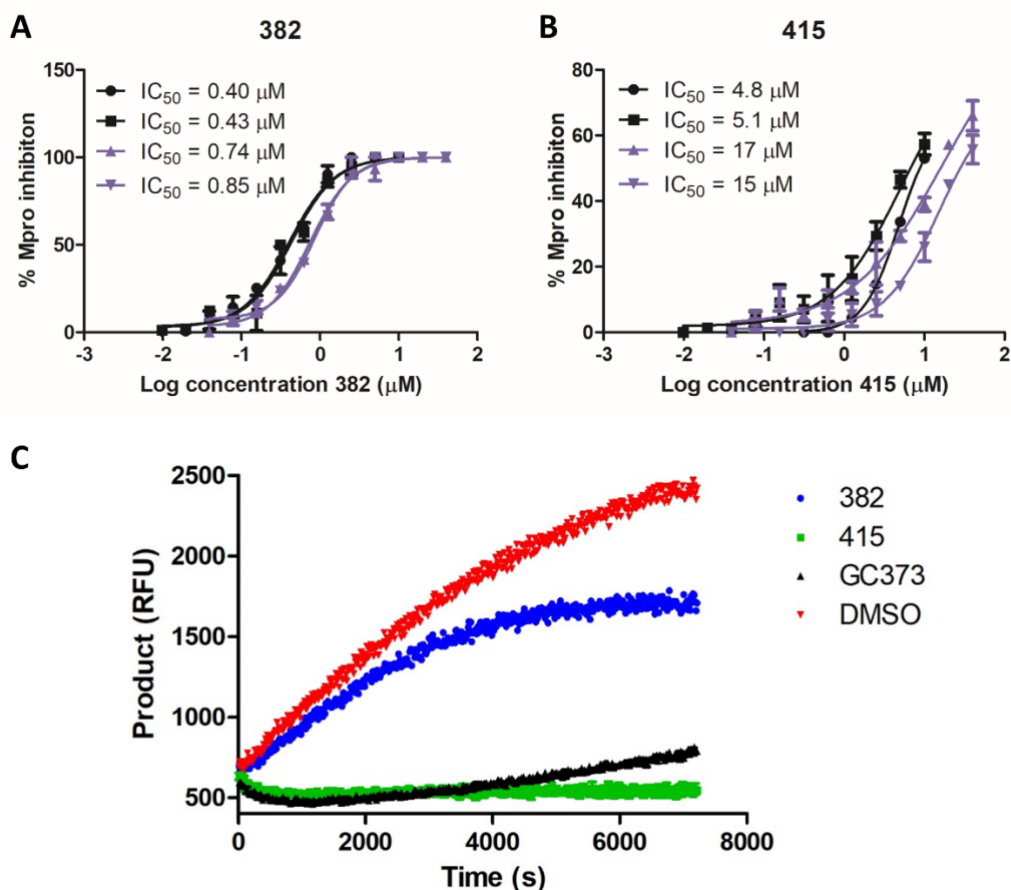

362  
363 **Figure 6.** Evaluation of time-dependence and reversibility of Mpro inhibition by  
364 compounds **382** and **415**. IC<sub>50</sub> curves for SARS-CoV-2 Mpro inhibitors **382** (A) and **415**  
365 (B). For each compound, two IC<sub>50</sub> curves are shown, corresponding to two independent  
366 experiments (data shown as spheres or squares for each experiment), in which the  
367 compounds were pre-incubated with Mpro prior to substrate addition (black) and without  
368 preincubation with the compounds (purple). Reversibility assay (C). After preincubation  
369 of Mpro with compounds, at higher concentrations, the sample was diluted, and product  
370 formation was monitored for 120 minutes. Compound **382** reduced the enzymatic reaction  
371 rate by 26% compared to vehicle control (red), while the compound **415** reduced product  
372 formation by 100%, and this activity was not restored over a 2h period post dilution, as  
373 observed for the covalent inhibitor GC373 (black).

374 To gain insights into the proposed binding mode of our Mpro inhibitors and guide  
375 future optimization efforts, we conducted docking and MD studies with compounds **382**  
376 and **415**, representatives from two inhibitor scaffolds discovered. Our simulations  
377 considered the **415** ligand covalently bound, given the proposed reaction mechanism  
378 (**Figure 7A**), to both monomers in the Mpro dimer, and **382** freely. For the free  
379 simulations, however, the loss of interactions with E<sub>166</sub> resulted in ligands being expelled

380 from one of the binding sites within a few nanoseconds (~200 ns) of simulation  
381 (Supporting Information **Table S2**). Our analysis is focused on the other binding site, that  
382 retained the ligand with stable interactions along the analyzed trajectory.

383 For both ligands, the most representative binding modes observed in the MD  
384 simulations (**Figure 7A** and **7B**) retain key interactions proposed based on docking with  
385 Glide (Supporting Information **Figure S45**). However, compound **415** showed a more  
386 conserved binding mode throughout the trajectory, being well represented by a single  
387 pose, in which the nitro group interacts with the S1 pocket and the 1,4 naphthoquinone  
388 interacts with the catalytic H<sub>41</sub> and S2 subsite residues (**Figure 7B**). On the other hand,  
389 the higher variability in the orientation of compound **382** led to four clusters with  
390 frequency between 17.5 and 31.7% (Supporting Information **Figure S48**). Overall, the  
391 1,4-naphthoquinone ring of ligand **415** occupies the S1 pocket, but fluctuations in the ring  
392 orientation reflect on varied positions for the phenyl substituents. In the most populated  
393 cluster (**Figure 7C**), the methoxyphenyl substituents occupy the S1' and S2 subsites.

394 Compounds **382**, and **415** display stable polar contacts (hydrogen bond and water  
395 bridges) with G<sub>143</sub> and S<sub>144</sub> in the S1 pocket and  $\pi$ -cation or  $\pi$ - $\pi$  interactions with the  
396 sidechain of H<sub>41</sub>. These interactions were more frequent in the covalent simulations. The  
397 ligands also display stable polar interactions with the main-chain nitrogen from E<sub>166</sub> and  
398 electrostatic contacts with its side-chain (**Figure 7D** and **7E**), a residue that adopts a stable  
399 conformation due to an interaction between its sidechain and the S<sub>1</sub> from the other  
400 protomer (S<sub>1</sub>\*). Hydrophobic interactions to M<sub>49</sub> and M<sub>165</sub> from the S2 pocket, are  
401 seldomly observed for these inhibitors and frequent interactions with the side-chain of  
402 C<sub>145</sub> was seen for the covalent inhibitor.

403

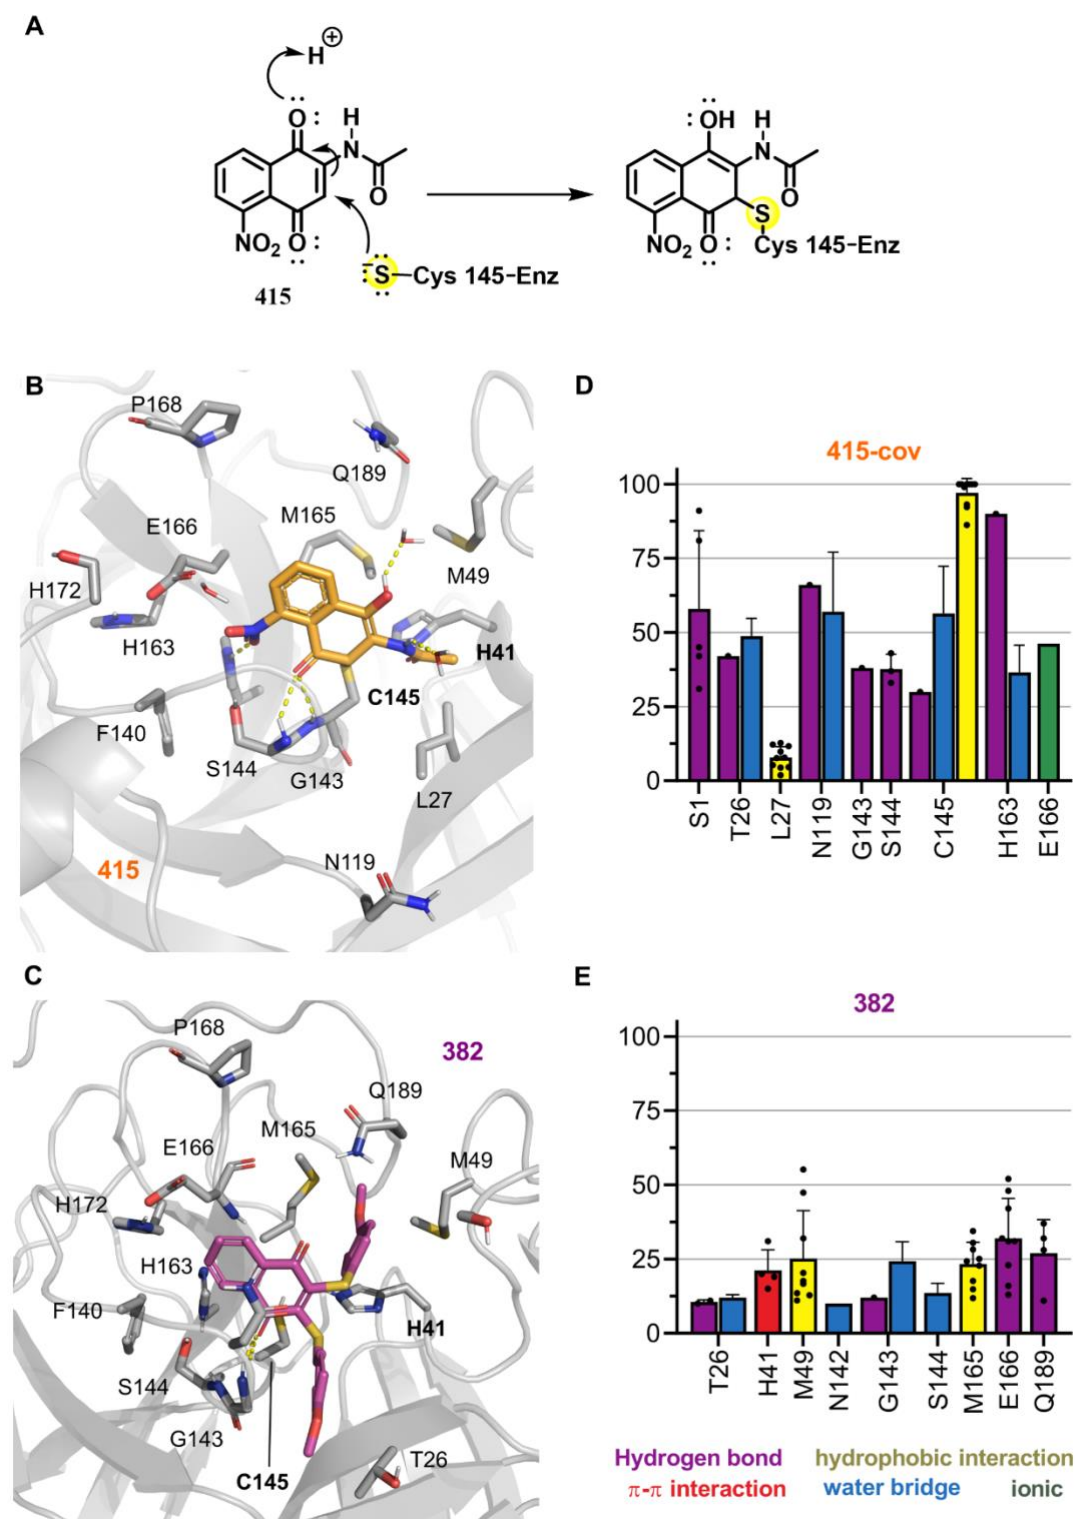

404

405 **Figure 7.** Predicted binding modes of compounds **415** and **382** to SARS-CoV-2 Mpro.

406 The proposed mechanism of **415** covalent binding to C<sub>145</sub> (A). Proposed binding modes

407 from a representative frame in the MD simulation of compounds (B) **415** (orange)

408 covalently bound to Mpro C<sub>145</sub>, and (C) **382** (pink) bound to Mpro, and the frequency of

409 protein-ligand interactions for all simulations with ligands (D) **415** and (E) **382**. Mpro

410 residues are colored according to the types of atoms in the interacting amino acid residues  
411 (protein carbon, light gray; nitrogen, blue; oxygen, red; sulfur, yellow), hydrogen bond  
412 interactions are represented as yellow dashed lines. Mean interaction frequency is  
413 represented, with standard error of the mean (N=5) interval depicted as error bars, each  
414 point displays the individual value for a particular simulation replica and each chain.

415

## 416 **2.6. Validation of novel PLpro inhibitors**

417

418 Although our virtual screening studies were focused solely on Mpro, we were also  
419 interested in testing the virtual screening hits against the second SARS-CoV-2 cysteine  
420 protease, PLpro, to determine if any of the molecules were dual inhibitors of the viral  
421 enzymes. PLpro cleaves three sites on the viral polypeptide but also acts as a de-  
422 ubiquitinase. Therefore, we identified a fluorogenic substrate for human de-ubiquitinases  
423 (Z-RLRGG-7-amino-4-methylcoumarin) as a substrate for SAR2-CoV-2 PLpro.  
424 Recombinant PLpro was incubated with 6  $\mu$ M to 500  $\mu$ M of this substrate and the  $K_M$   
425 value was calculated to be  $376.6 \pm 32.3 \mu$ M. PLpro enzyme was pre-incubated with the  
426 same set of 23 compounds at 10  $\mu$ M and then assayed with the fluorogenic substrate.  
427 Compound **668** was again eliminated due to insolubility in the assay buffer. Surprisingly,  
428 a total of 12 compounds inhibited PLpro by > 50% and the top three (compounds **159**,  
429 **189**, and **191**) inhibited at > 90%. These top compounds are *ortho*-quinone-based 1,2,3-  
430 triazoles derivatives, sharing a common scaffold. The  $IC_{50}$  values were calculated to be  
431 1.7  $\mu$ M, 2.2  $\mu$ M, and 3.1  $\mu$ M for compounds **159**, **189**, and **191**, respectively (**Figure 8**).  
432 Among the compounds that caused lower PLpro inhibition, five are N-substituted analogs  
433 of these hits, compounds **193-197**, and had  $IC_{50}$  values between 20 and 46  $\mu$ M (**Table 1**,  
434 **Figure 7**). These eight PLpro inhibitors share a tricyclic 1,2-naphthoquinone ring that  
435 seems important for enzyme inhibition, as its replacement by a *para*-tolyl sulfone  
436 abolished activity against PLpro (compare compounds **189** vs **319**; **191** vs **321**; **193** vs  
437 **314**; and **197** vs **318**, **Table 1**).

438

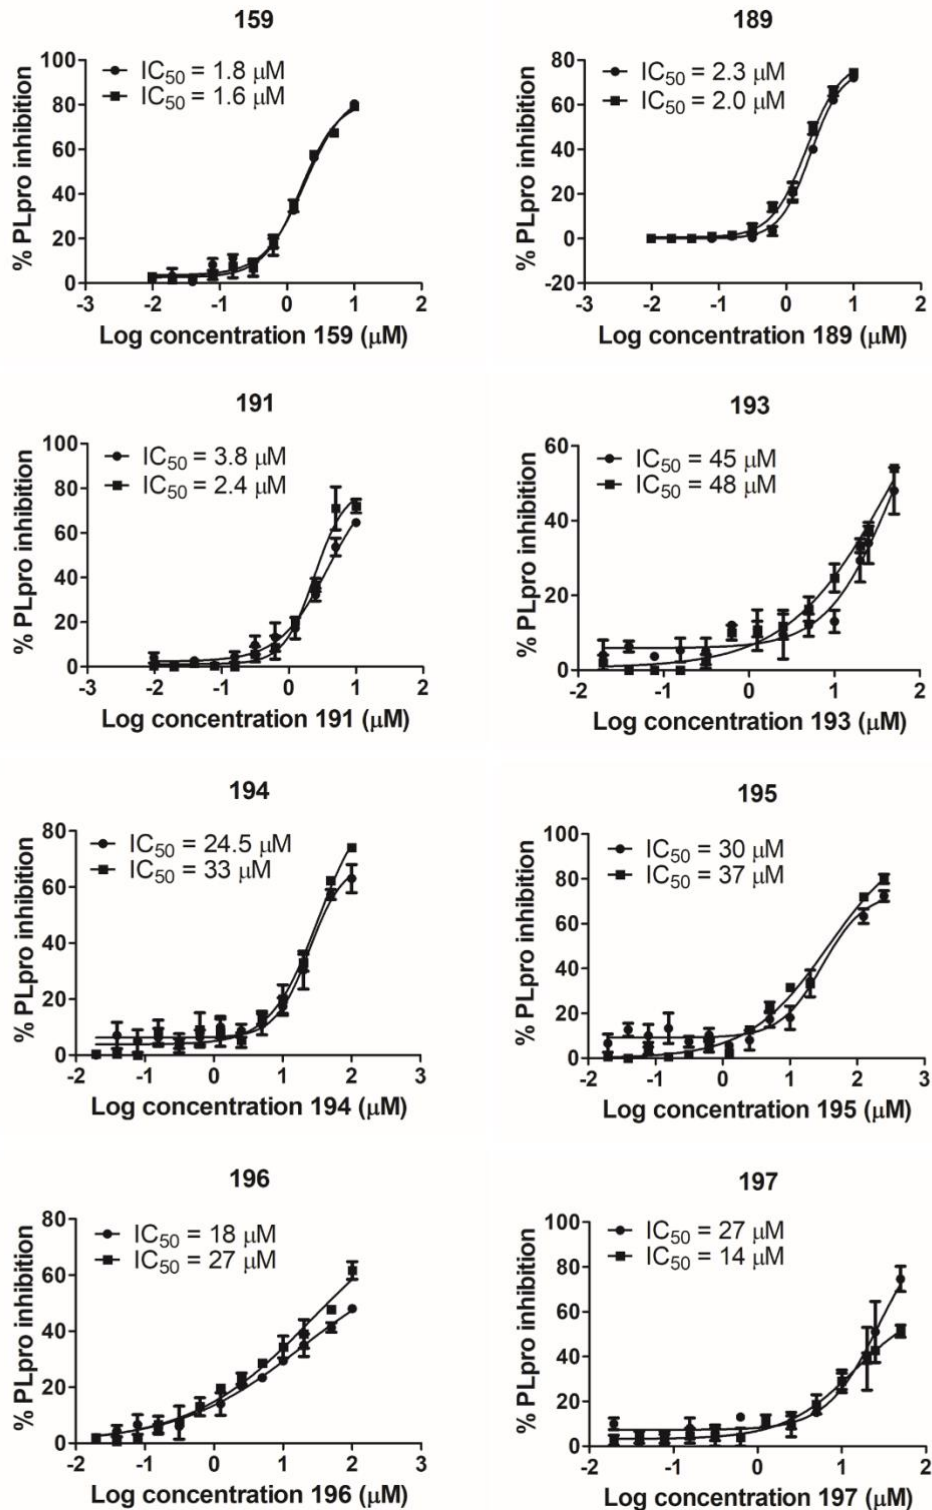

439

440

**Figure 8.** IC<sub>50</sub> curves for SARS-CoV-2 PLpro inhibitors. For each compound, two IC<sub>50</sub> curves are shown, corresponding to two independent experiments (data shown as spheres or squares for each experiment). Each curve was determined based on at least 11 compound concentrations in triplicate.

441 Since the PLpro inhibitors have a shared scaffold, we selected compounds **189**  
442 and **195** (N-substituted) for computational studies. The SARS-CoV-2 PLpro has similar  
443 folding to the homologous enzymes from other coronaviruses [132], with domains  
444 showing a “thumb-palm-fingers” pattern and an N-terminal ubiquitin-like (Ubl) domain  
445 (first 60 residues) (**Figure 9A**) [40]. As a cysteine protease, PLpro contains a canonical  
446 catalytic triad, Cys-His-Asp (C<sub>111</sub>, H<sub>272</sub>, and D<sub>286</sub>) [10] located in a solvent-exposed cleft  
447 at the interface of the palm and thumb domains [40]. Analysis of common protein-ligand  
448 interactions from the crystallographic structures showed little or no interaction with the  
449 catalytic triad, in agreement with very narrow S1 and S2 pockets, which have high  
450 specificity for glycine (**Figure 9B** and Supporting Information **Figure S49**). Only  
451 covalently bound peptidic inhibitors, containing glycines at P1 and P2, occupy these  
452 pockets [37,40]. Instead, the non-covalent ligands bind to a groove corresponding to the  
453 S3 and S4 subsites, approximately 8 Å from the catalytic cysteine [37]. This groove is  
454 created due to the blocking loop 2 (BL2 loop), a flexible substrate-binding loop (Gly<sub>266</sub>-  
455 Gly<sub>271</sub>) found adjacent to the active site (**Figure 9A** and **B**). The BL2 loop is found in an  
456 open conformation in unbound PLpro, while it closes upon substrate or inhibitor binding  
457 [37].

458

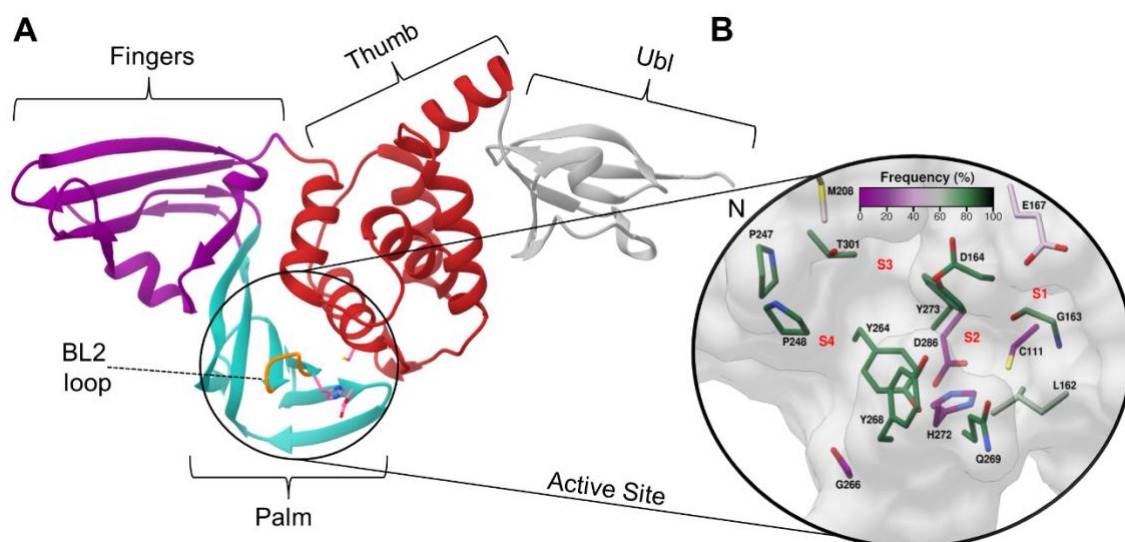

459

460 **Figure 9.** PLpro three-dimensional structure (PDB code: 7LBR [40]) and surface view of  
461 the active site. The four domains, fingers (purple), palm (green), thumb (red), and Ubl  
462 (gray) are showed in the cartoon representation (A). The BL2 loop (orange, Gly<sub>266</sub>-Gly<sub>271</sub>)  
463 is indicated by a line. The substrate binding cleft is highlighted with the catalytic triad  
464 C<sub>111</sub>, H<sub>272</sub>, and D<sub>286</sub> displayed as sticks (pink) (B). In the close-up view of the active site,

465 the residues are colored by the frequency they are involved in interactions with 21  
466 crystallography ligands, according to an analysis using the program LUNA.

467

468

469 As observed for the crystallography ligands, compounds **189** and **195** showed  
470 docking predicted binding modes occupying the S3 and S4 subsites (**Figures 9, 10** and  
471 Supporting Information **S49**). To verify the stability of these proposed binding modes,  
472 compounds **189** and **195** underwent MD simulations. The XR8-89 ligand (PDB code  
473 7LBR [40]) was used as a positive control.

474 In simulations with XR8-89, the BL2 loop remained in the closed conformation,  
475 and the ligand binding mode remained stable in all simulations, with its core structure  
476 being stabilized by hydrogen bond interactions between the carbonyl group and the  
477 backbone of Q<sub>269</sub> (100% of the analyzed simulation time), as well as  $\pi$ -stacking  
478 interactions with Y<sub>268</sub> (79% of the analyzed simulation time) (**Figures 10** and Supporting  
479 Information **S50**). We also observed a water bridge between the nitrogen on the amide  
480 and D<sub>164</sub> (subsite S3, present on average 22% of the analyzed trajectory).

481 For **189**, four of the five simulated replicas showed stable interactions, with the  
482 initial pose changing dramatically from the initial coordinates after 500 ns in one of the  
483 replicas. In terms of binding mode, the triazole and central amine groups of **189** established  
484 hydrogen bond interactions with the Q<sub>269</sub> (35% of the analyzed trajectory) and  $\pi$ -based  
485 interactions with Y<sub>264</sub>. The carbonyl groups from the naphthalene-1,4-dione moiety  
486 displayed water-mediated interactions with D<sub>164</sub>. The 1,2-naphthoquinone ring, shown to  
487 be essential for protease inhibition in our biochemical assays, binds to the S4 pocket,  
488 establishing hydrophobic interactions to P<sub>248</sub> (**Figure 10B**).

489 In contrast to the observed for XR8-89 and **189**, the tolyl substituent on the amine  
490 of **195** prevented stable simulations on BL2 closed conformation. Thus, we performed  
491 1  $\mu$ s simulation initially, which displayed at first few interactions with the sidechain of  
492 Q<sub>269</sub> (less than 20% of simulation time) and later stable interactions with D<sub>164</sub> (over 66%  
493 of simulation time), while leading to the opening of BL2 and accommodating of the  
494 ligand. The last frame of this simulation was used to generate a further five new replicas  
495 (5 x 500 ns), to analyze the stability of this new binding mode, which was shown to be  
496 stabilized by water bridges with the D<sub>164</sub> (>75%), R<sub>166</sub> (>40%) and Y<sub>273</sub> (~ 40%) and  
497 hydrophobic contacts with P<sub>248</sub> (>40%) (**Figure 10**).

498



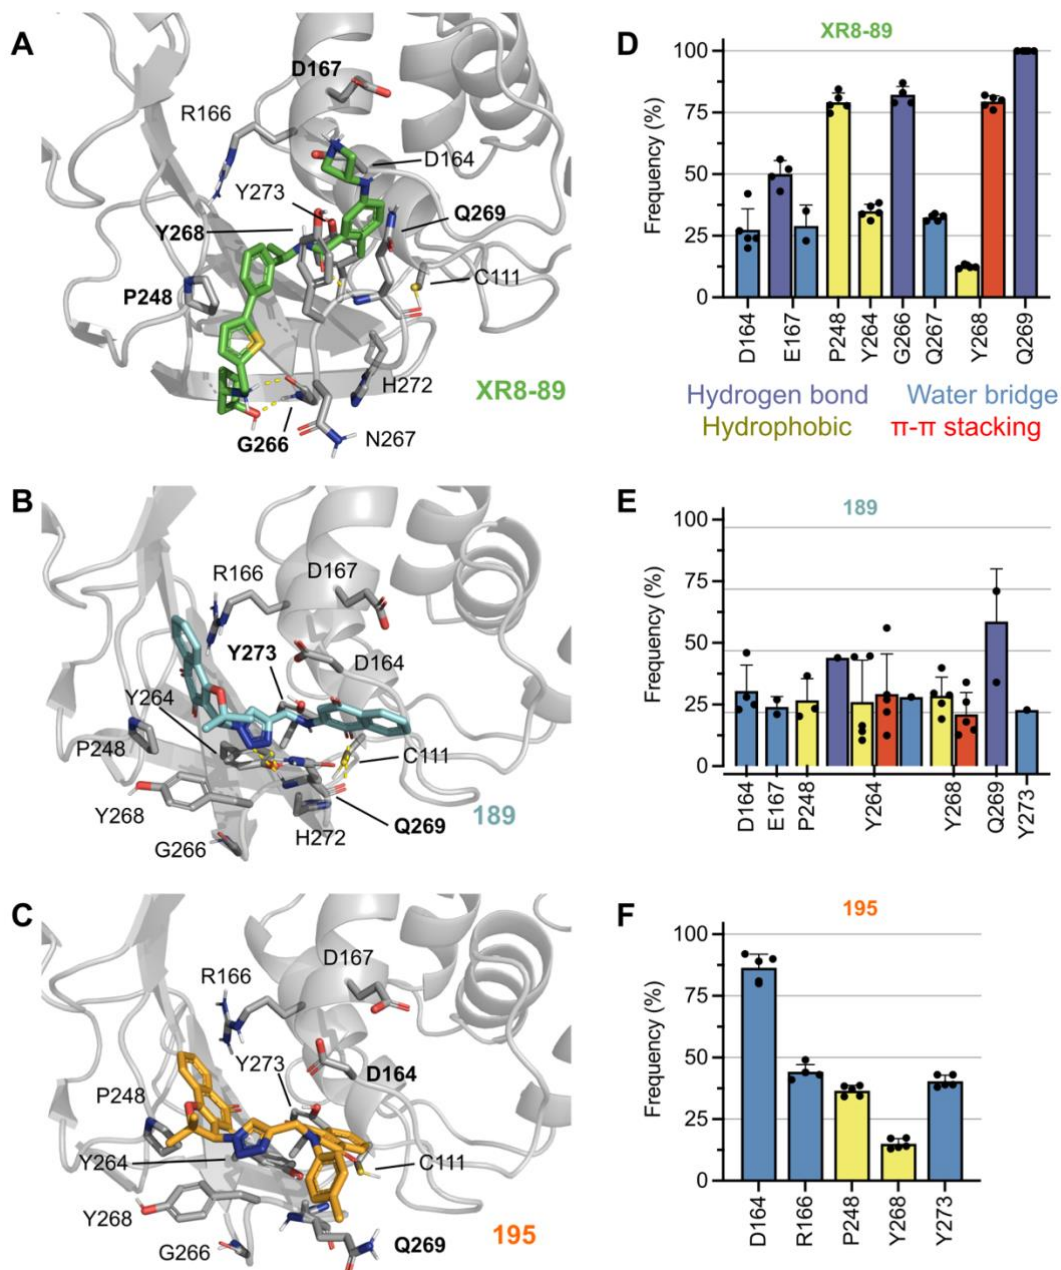

499

500 **Figure 10.** Proposed binding modes and protein-ligand interactions profile for PLpro  
 501 inhibitors. Representative frames from the MD simulation describing the potential  
 502 binding mode (A-C) for compounds **XR8-89** (green, from PDB code 7LBR [40]), **189**  
 503 (cyan) and **195** (orange) bound to PLpro. PLpro residues are colored according to the  
 504 types of atoms in the interacting amino acid residues (protein carbon, light gray; nitrogen,  
 505 blue; oxygen, red; sulfur, yellow), hydrogen bond interactions are represented as yellow  
 506 dashed lines. Frequency of protein-ligand interactions for all simulations with ligands  
 507 **XR8-89** (D), **189** (E) and **195** (F). Mean interaction frequency is represented, with  
 508 standard error of the mean (N=5) interval depicted as error bars, each point displays the  
 509 individual value for a particular simulation replica.

## 510 **2.7. Evaluation of hit compounds in a SARS-CoV-2 viral infection assay**

511

512 We evaluated two Mpro hit compounds **382** and **415** and two PLpro hit  
513 compounds **189** and **191** in a SARS-CoV-2 viral infection assay of monkey-derived Vero  
514 E6 cells. The clinically approved RNA-polymerase inhibitor, remdesivir was used as a  
515 positive control. Remdesivir displayed antiviral efficacy in Vero E6 cells with EC<sub>50</sub> of  
516 2.45 μM and no host cell toxicity at concentrations up to 20 μM. Under the same culture  
517 conditions the hit naphthoquinone compounds were tested in three concentrations (24  
518 μM, 6 μM, and 1.4 μM) and showed no significant antiviral activity dissociated from host  
519 cytotoxicity (Supporting Information **Figure S51**). We decided to test some compounds  
520 in serial dilution starting at 1 μM and in infected human-derived HeLa cells expressing  
521 ACE2 in addition to infected Vero cells. For HeLa-ACE2 cells, remdesivir was more  
522 potent with EC<sub>50</sub> of 40 nM, however, cell cytotoxicity was also noted at concentrations  
523 above 2.4 μM. At lower concentrations the naphthoquinone compounds had no  
524 significant antiviral activity up to 1 μM (Supporting Information **Figure S52**). Therefore,  
525 it is important to further study the mechanism of action to understand the cytotoxicity and  
526 decouple from the direct antiviral activity.

527

528

## **3. Discussion**

529

530 In this study, we used computational and biochemical approaches to evaluate a  
531 library of quinones to find inhibitors against SARS-CoV-2 proteases. The wealth of  
532 structural information from Mpro and PLpro allowed us to generate patterns of common  
533 protein-ligand interactions, which were helpful in two stages of our computational  
534 analysis. First, the selection of computational hits was guided by protein-ligand  
535 interactions frequently observed in Mpro crystallographic complexes. Thus, we  
536 prioritized compounds that interacted with conserved water molecules, S1 and S2  
537 residues, filling one or more of the subsites with minimum solvent exposure. This strategy  
538 was successful as, among 24 compounds selected for inhibitory assays, three molecules  
539 with two different scaffolds were confirmed as Mpro inhibitors with low micromolar or  
540 submicromolar potency (compounds **382**, IC<sub>50</sub> of 0.41 μM; **379**, IC<sub>50</sub> of 0.63 μM; and  
541 **415**, IC<sub>50</sub> of 5.0 μM), and another four compounds inhibited the enzyme by more than  
542 50% at 10 μM. Additionally, for Mpro and PLpro inhibitors that were evaluated  
543 experimentally, we conducted MD simulations of the protein-ligands complexes.

544 Together with the observed stability of binding poses during the simulations, the fact that  
545 our inhibitors establish interaction patterns commonly observed in the crystal structures  
546 encourages the application of our results in structure-based optimization projects.

547 During the validation of Mpro and PLpro inhibitors, several precautions were  
548 taken to avoid artifactual inhibition. We were especially careful considering previous  
549 reports that indicate quinones as potential Pan Assay Interference Compounds (PAINS)  
550 [133]. To avoid common causes of artifacts [128–130], we conducted the assays in the  
551 presence of detergent, avoiding compound aggregation, and verified that compounds  
552 were not highly fluorescent. In addition, a comparison of the inhibition of both target  
553 enzymes by each of the compounds indicates that all inhibitors showed specificity to one  
554 of our targets, reducing the likelihood they would be promiscuous inhibitors.  
555 Furthermore, to assess if Mpro inhibitors were time-dependent and/or irreversible  
556 inhibitors, we determined IC<sub>50</sub> values of compounds **382** and **415** upon or without  
557 preincubation with the enzyme, and evaluated recovery of enzyme activity in a  
558 reversibility assays. Our results indicated that compound **382** is a reversible Mpro  
559 inhibitor, while **415** binds irreversibly to the target. This information was taken into  
560 account in our MD simulations, in which compound **415** was covalently bound to the  
561 enzyme, while compound **382** was simulated in a noncovalent complex.

562 An interesting pattern emerged in our MD simulations with Mpro complexes. For  
563 both compounds **382** and **415**, the simulations suggested stability of the complexes via  
564 multiple intermolecular interactions, with H<sub>41</sub>, G<sub>143</sub>, and E<sub>166</sub>. All three residues have  
565 reported key roles in the active site. As part of the catalytic dyad, H<sub>41</sub> serves as a base for  
566 nucleophilic attack performed by C<sub>145</sub> in peptide-bond cleavage [134], while G<sub>143</sub>, an  
567 oxyanion hole residue, helps stabilize the tetrahedral intermediate of the peptide-bond  
568 cleavage [135]. Moreover, E<sub>166</sub> is essential for dimerization and its interactions with the  
569 other protomer N-finger also aid the correct orientation of H<sub>163</sub> and H<sub>172</sub> to form the S1  
570 pocket [135,136]. However, long-lasting interactions were observed only from one of the  
571 protomers' binding sites, while the ligand bound to the other protomer was expelled  
572 within a few nanoseconds. The instability in one of the protomers was observed as a  
573 reproducible pattern in most replicates of our MD simulations. The complete deletion of  
574 the N-finger (residues S<sub>1</sub>\* – R<sub>4</sub>\*) in SARS-CoV Mpro, reduces the extent of the  
575 dimerization and completely abolishes the enzymatic activity (<1%) [137]. Simulations  
576 of Mpro from SARS-CoV-2 with peptidomimetic inhibitors or substrate [138], suggest  
577 that a similar mechanism exists, where the N-finger conformation upon dimerization

578 exerts a direct influence on the oxyanion-loop motions and the stabilization of the  
579 catalytic conformation.

580 Our initial focus was on Mpro inhibition, however, we also tested the 23 soluble  
581 compounds selected against PLpro, to possibly find dual inhibitors for both SARS-CoV-  
582 2 viral enzymes. Despite the numerous efforts to develop inhibitors of the SARS-CoV-2  
583 proteases, reports of dual Mpro/PLpro SARS-CoV-2 inhibitors are still scarce [139]. In  
584 the current study, the only dual inhibitor found was **191**, with modest Mpro inhibition  
585 ( $IC_{50} = 66 \mu\text{M}$ ) and more potent PLpro inhibition ( $IC_{50} = 3.1 \mu\text{M}$ ). Developing an  
586 effective dual inhibitor would require further optimization, but compound **191** is a  
587 candidate for such efforts. In addition, eight *ortho*-quinone-based 1,2,3, triazoles had  $IC_{50}$   
588  $< 50 \mu\text{M}$  against PLpro, including three inhibitors with  $IC_{50}$  in the single-digit micromolar  
589 range (compounds **159**,  $IC_{50}$  of  $1.7 \mu\text{M}$ ; **189**,  $IC_{50}$  of  $2.2 \mu\text{M}$ ; and **191**,  $IC_{50}$  of  $3.1 \mu\text{M}$ ).  
590 Considering the evidence supporting each SARS-CoV-2 protease as a therapeutic target  
591 [37,140,141], these compounds are interesting even in the absence of dual inhibition. MD  
592 simulations of **189** and **195** bound to PLpro were not as stable as the positive control  
593 XR8-89 (PDB code 7LBR [40]). The two scaffolds interacted, with low or moderate  
594 frequency, with residues in the S3 and S4 subsites, however, lacking long-lasting  
595 interactions with key residues, such as Y<sub>268</sub> and Q<sub>269</sub>. These two residues form an unusual  
596  $\beta$ -turn in the flexible  $\beta$ -hairpin BL2 loop that controls the access to the active site in the  
597 binding of host and viral proteins [40]. Thus, compound **189** and, particularly, **195** might  
598 not fully stabilize the closed conformation of BL2 loop as well as the potent XR8-89.

599

600

#### 4. Conclusion

601

602 Here, we employed computational and biochemical assays to evaluate a quinones  
603 library, leading to the identification of 11 promising naphthoquinoidal inhibitors against  
604 the two SARS-CoV-2 viral proteases, Mpro and PLpro, with potency in the mid  
605 micromolar to nanomolar range. For all inhibitors experimentally characterized, we  
606 propose likely binding modes with good complementarity to the protease active sites, that  
607 closely resemble protein-ligand interaction patterns observed in crystallographic  
608 complexes and which were stable in MD simulations. Hence, the inhibitors presented here  
609 are novel scaffolds for further optimization to develop a treatment against SARS-CoV-2  
610 infection.

611

612  
613  
614  
615  
616  
617  
618  
619  
620  
621  
622  
623  
624  
625  
626  
627  
628  
629  
630  
631  
632  
633  
634  
635  
636  
637  
638  
639  
640  
641  
642  
643  
644  
645

## 5. Experimental Section

### 5.1. Compounds general experimental details

All chemicals were obtained from commercial sources and used without further purification. Melting points were obtained on a Thomas Hoover apparatus and are uncorrected. Column chromatography was performed on silica gel (Silica Flash G60 UltraPure 60-200  $\mu\text{m}$ , 60  $\text{\AA}$ ). Infrared spectra were recorded on a Shimadzu FTIR Spectrometer IR Prestige-21.  $^1\text{H}$  and  $^{13}\text{C}$  NMR were recorded at room temperature using a Bruker AVANCE DRX 200 and DRX 400 MHz, in the solvents indicated, with tetramethylsilane (TMS) as internal reference. Chemical shifts ( $\delta$ ) are given in parts per million (ppm) and coupling constants (J) in Hertz (Hz). The mass spectrometer was operated in the positive ion mode. A standard atmospheric pressure photoionization (APPI) source was used to generate the ions. The sample was injected using a constant flow (3  $\mu\text{L}/\text{min}$ ). The solvent was an acetonitrile/methanol mixture. The APPI-Q-TOF MS instrument was calibrated in the mass range of 50-3000 m/z using an internal calibration standard (low concentration tuning mix solution) supplied by Agilent Technologies. Data were processed employing Bruker Data Analysis software version 4.0. Compounds were named following IUPAC rules as applied by ChemBioDraw Ultra (version 12.0).

### 5.2. Synthesis of candidate inhibitors

*Ortho*-quinone-based 1,2,3-triazoles compounds **159**, **189**, **191-197**, were prepared according to previously reported reports and their data are consistent with the literature [80,82,91,142]. *Para*-quinones-based 1,2,3-triazoles compounds **314**, **318-321** were prepared as described in the literature [90]. *Para*-quinones and derivatives **379**, **380**, **382**, **414**, **415**, **465**, **470**, **477**, were synthesized following the previously published studies in the literature [76,99]. Hydrazo derivatives **666**, **668** and **673** were prepared according to previously published reports and their data are consistent with the literature [68]. NMR spectra for all compounds have been previously published when they were originally described.

### 5.3. Comparison of available SARS-CoV-2 Mpro structures

646 All 72 crystallographic structures were downloaded from the PDB [143]  
647 (structures available in April/2020). Structural superposition was performed with  
648 program R [144]'s package, Bio3D [145], using the protein's C $\alpha$ . RMSD and PCA were  
649 also done with Bio3D package. As water molecules might play important roles in Mpro  
650 catalysis and ligand stabilization, we used the ProBiS H2O plugin [123]. This PyMol  
651 [146] plugin enables the identification of conserved water sites in proteins using  
652 experimental determined protein structures. The highest resolution structure, PDB code  
653 5R82 [117], was used as reference to establish the water molecules position.

654

#### 655 **5.4. Analysis of protein-ligand interactions**

656

657 The program LUNA (<https://github.com/keiserlab/LUNA>) was used to perform  
658 large-scale analysis of non-covalent interactions between the protein-ligands complexes  
659 of Mpro. With this program, it was possible identify frequently interacting residues  
660 between the ligands and Mpro active site. We submitted a list containing the of PDB ids  
661 of the 72 structures, discriminating chain A and the binding site ligands to be analyzed.  
662 After processing, we investigated the table (in .csv format) of the interacting frequencies  
663 by residues and ligands with program R.

664

#### 665 **5.5. Ligand and protein preparation**

666

667 Three-dimensional ligand structures were generated with LigPrep (version  
668 46013), using Epik to predict their protonation in pH  $7.0 \pm 2.0$ , and generating tautomers  
669 and diastereoisomers. The OPLS3e force-field was employed for structure generation.  
670 The SARS-CoV-2 Mpro protein structure was prepared from the PDB 5R82 [117], using  
671 the Protein Wizard Preparation tool, with standard options. Two Mpro receptor files were  
672 prepared for docking: one with all water removed and another containing waters 1189  
673 and 1284 from the original PDB. The SARS-CoV-2 PLpro structure was prepared from  
674 the PDB 7LBR [40], using the same protocol as Mpro.

675

#### 676 **5.6. Molecular docking**

677

678 Molecular docking was carried out with Glide SP (version 9.1) and Autodock  
679 Vina. For docking to Mpro with Glide [124], grids were centered at the central point of

680 the active site residues G<sub>143</sub>, C<sub>145</sub>, M<sub>49</sub> and H<sub>41</sub> (coordinates: 10.7313390385, -  
681 4.49000171154, 22.4985591538). Two docking grids were generated: one without waters  
682 and one containing the two conserved waters described in the protein preparation. Each  
683 compound was docked using both grids. In both cases, the dimensions of the inner box  
684 had 10 Å in each direction and the outer box had 30 Å in each direction. Whenever  
685 mentioned, covalent docking as performed using CovDock [147] using the C<sub>145</sub> as anchor,  
686 nucleophilic addition to double bond as reaction type and generating up to 10 poses for  
687 each ligand. Poses were selected according to the docking score and relevant interactions.

688 For docking to Mpro with Autodock Vina [125], a grid box of size 22.5x24.5x22.5  
689 Å was centralized in the geometrical center among the residues T<sub>26</sub>, M<sub>49</sub>, N<sub>142</sub>, and M<sub>165</sub>.  
690 All the experiments were done in triplicate starting from a random seed. Energy range,  
691 exhaustiveness, and the number of maximum modes parameters were set to 3 kcal/mol,  
692 8, 9, respectively. Similar to docking using Glide, two experiments were done with and  
693 without conserved waters. For selected ligands, induced-fit docking was performed (with  
694 and without the conserved waters) by flexing the residues N<sub>142</sub>, E<sub>189</sub>, M<sub>49</sub>, and M<sub>165</sub>.

695 For docking to PLpro with Glide, using the Induced-Fit mode [148], a cubic grid  
696 box of size 12 Å was centralized in the geometric center of the co-crystallized ligand  
697 (PDB code 7LBR [40]).

698

699

## 5.7. Molecular Dynamics simulations

700

701 Prepared SARS-CoV-2 Mpro and PLpro structures were simulated with the  
702 selected ligands. MD simulations were carried out by using the Desmond engine [149]  
703 with the OPLS3e force-field [150] according to a previously described protocol [151]. In  
704 short, the system encompassed the protein-ligand/cofactor complex, a predefined water  
705 model (TIP3P [152]) as a solvent and counterions (Na<sup>+</sup> or Cl<sup>-</sup> adjusted to neutralize the  
706 overall system charge). The system was treated in a cubic box with a periodic boundary  
707 condition (PBC) specifying the shape and the size of the box as 13 Å distance from the  
708 box edges to any atom of the protein. Short-range coulombic interactions were calculated  
709 using 1 fs time steps and 9.0 Å cut-off value, whereas long-range coulombic interactions  
710 were estimated using the Smooth Particle Mesh Ewald (PME) method [153]. Each Mpro  
711 and PLpro systems were subjected to at least 5 μs simulations (five replicas of 1 μs each),  
712 with exception of PLpro – compound **195**, which had one preliminary 1 μs simulation,  
713 from which a stable conformation was selected for further shorter simulations. Atomic

714 interactions and distances were determined using the Simulation Event Analysis pipeline  
715 as implemented in Maestro 2020.2 (Schrödinger LCC).

716 Representative frames of the simulations were retrieved from clustering, which  
717 was performed with hierarchical clustering analyses. Trajectories were clustered using  
718 the script `trj_cluster.py` (implemented in Maestro 2021.2, Schrödinger LCC) using 2 Å as  
719 cut-off, which was chosen upon evaluating the RMSD of ligand's heavy atoms.  
720 Trajectories where the ligand was expelled of the pocket were not considered for  
721 clustering or interaction analyses.

722 RMSD values of the protein backbone were used to monitor simulation  
723 equilibration and protein folding changes (Supporting Information Figure S50). All the  
724 trajectory and interaction data are available on the Zenodo repository (code:  
725 10.5281/zenodo.5147951). MD trajectories were visualized, and figures produced by  
726 PyMol v.2.4 (Schrödinger LCC, New York, NY, USA).

727

728

## 729 **5.8. Synthesis of Mpro substrate**

730

731 A quenched fluorogenic peptide substrate with the sequence (D-Arg)-(D-Arg)-  
732 Lys(MCA)-Ala-Thr-Leu-Gln-Ala-Ile-Ala-Ser-Lys(DNP)-COOH (ATLQAIAS) was  
733 synthesized on a Biotage Syroll peptide synthesizer at room temperature through  
734 fluorenylmethyloxycarbonyl (Fmoc) solid-phase synthesis. The synthesis scale was 12.5  
735 µmole with preloaded lysine(2-dinitrophenyl) Wang resin, where the DNP quencher was  
736 linked to the epsilon nitrogen of the lysine. For each coupling reaction, 4.9 equivalents of  
737 HCTU (O-(1H-6-chlorobenzotriazole-1-yl)-1,1,3,3-tetramethyluronium hexafluoro-  
738 phosphate), 5 equivalents of Fmoc-amino acid-OH, and 20 equivalents of N-  
739 methylmorpholine (NMM) in 500 µL N,N-dimethylformamide (DMF) were used. The  
740 coupling reaction was carried out with shaking for 8 minutes. Each amino acid position  
741 was double coupled, and subsequent Fmoc deprotection was done with 500 µL of 40% 4-  
742 methylpiperidine in dimethyl formamide (DMF) for 10 minutes. Deprotection was  
743 followed by a wash with 500 µL of DMF for 3-minutes and the wash was repeated 6  
744 times. The lysine amino acid, lysine (7-methoxycoumarin-4-acetic acid (MCA), was  
745 coupled where MCA was linked to the epsilon nitrogen of the lysine. The two final amino  
746 acid position couplings used d-Arginine to increase peptide solubility. The cleavage of  
747 the peptide from the Wang resin was carried out with a 500 µL of solution composed of



748 95% trifluoroacetic acid, 2.5% water, and 2.5% triisopropylsilane at room temperature  
749 for 1 hour with shaking. The crude peptide product was precipitated in 30 mL of a 1:1  
750 mixture of cold diethyl ether and hexane. Product was then solubilized in a 1:1:1 mixture  
751 of DMSO, water and acetonitrile. The solubilized crude material was purified by high-  
752 performance liquid chromatography (HPLC) using an Agilent Pursuit 5 C18 column (5  
753 mm bead size, 150 x 21.2 mm) on an Agilent PrepStar 218 series preparative HPLC.  
754 Mobile phase A was water + 0.1% TFA, and mobile phase B was acetonitrile + 0.1%  
755 TFA. The peptide product fractions were collected, combined, and had solvent removed  
756 under reduced atmosphere. The peptide substrate was solubilized in DMSO to a final  
757 concentration of 50 mM. Purity was confirmed by liquid chromatography-mass  
758 spectrometry and the stock was stored at -20°C.

759

760

### 5.9. Assays against Mpro

761

762 Recombinant SARS-CoV-2 Mpro was expressed and purified as described  
763 previously in Mellot et al. [48]. Mpro activity was measured using the fluorogenic  
764 substrate, ATLQAIAS, on a Biotek® Synergy HTX plate reader. All assays were  
765 performed in black flat-bottom 384-well plates, in 30  $\mu$ L of 50 mM Tris-HCl pH 7.5, 150  
766 mM NaCl, 1 mM EDTA, 0.01% Tween-20 using 50 nM Mpro and 10  $\mu$ M of FRET  
767 substrate. Initial screening was performed at 10  $\mu$ M. Prior to addition of the substrate,  
768 enzyme was incubated with the compounds for 15 minutes. Following the substrate  
769 addition proteolysis was measured at 320/420 nm (excitation/emission) at 25 °C. Percent  
770 inhibition was calculated relative to control reactions containing a maximum of 0.5%  
771 DMSO. Two independent experiments were performed in triplicate wells. Half-maximal  
772 inhibitory concentration (IC<sub>50</sub>) was determined by nonlinear regression analysis of the  
773 velocity vs. inhibitor concentration plot using GraphPad Prism 6 (GraphPad Prism,  
774 version 6.00, La Jolla, California, USA). At least seven inhibitor concentrations were  
775 used to build each curve. DMSO was used as negative control. The hit compounds **382**  
776 and **415** were also tested without incubation to investigate the time-dependency behavior.

777

778

### 5.10. Reversibility assay

779

780 Mpro at 100-fold its final assay concentration was incubated with the hits at 10-  
781 fold its respective IC<sub>50</sub> value for 30 min in a volume of 2  $\mu$ L. This mixture was diluted

782 100-fold with an assay buffer containing 10  $\mu$ M ATLQAIAS substrate to a final volume  
783 of 30  $\mu$ L, resulting in a standard concentration of Mpro and 0.1 times the IC<sub>50</sub> value of  
784 hits [130,131]. Fluorescence intensities were monitored continuously during substrate  
785 hydrolysis on Synergy 2 (BioTek®) plate reader for 120 minutes.

786

787

### 5.11. Assays against PLpro

788

789 Recombinant SARS-CoV-2 PLpro was purchased from Acro Biosystems, PAE-  
790 C5184. Proteolytic activity was measured using Z-Arg-Leu-Arg-Gly-Gly-AMC substrate  
791 (Bachem, 369 I1690) as described previously in Ashhurst et al. [154] The release of  
792 fluorescent 7-amido-4-methylcoumarin was measured at 360 nm/460 nm wavelengths for  
793 excitation/emission, on a Biotek® Synergy HTX. All assays were performed in 384-well  
794 black plate at 25 °C, in a final volume of 30  $\mu$ L of 50 mM HEPES pH 6.5, 150 mM NaCl,  
795 0.1 mM DTT, 0.01% Tween-20, 50 nM enzyme and 50  $\mu$ M of substrate. Enzymatic  
796 activity was calculated by comparison to initial rates of reaction of a DMSO control.  
797 Initial screening was performed at 10  $\mu$ M of each compound in triplicate wells.  
798 Compounds that inhibited by 75% or more of the PLpro activity in the initial screen had  
799 their IC<sub>50</sub> determined. At least two independent experiments were performed, each  
800 involving at least eleven compound concentrations in triplicates. IC<sub>50</sub> curves were  
801 obtained by non-linear regressions analysis of the velocity vs. inhibitor concentration  
802 using GraphPad Prism 6 (GraphPad Prism, version 6.00, La Jolla, California, USA).  
803 Reported IC<sub>50</sub> values refer to the mean values and the standard error of the mean.

804

805

### 5.12. Antiviral activity

806

807 Antiviral assays were performed according to the protocol previously described  
808 in Mellot et al. [48]. Compounds **189**, **191**, **382**, and **415** were evaluated in a SARS-CoV-  
809 2 viral infection assay of monkey-derived Vero E6 cells and human-derived HeLa cells  
810 that overexpress ACE2. Remdesivir was employed as a positive control. Each compound  
811 was evaluated in ten concentrations, in two-fold dilutions, from 20  $\mu$ M to 39 nM in the  
812 case of remdesivir and from 1.0  $\mu$ M to 1.9 nM for all other compounds, in triplicates.

813

814

## 6. Author Contributions

815

816 L.H.S. analyzed PDB structures and interaction patterns; L.H.S., R.E.O.R., and  
817 R.S.F performed and analyzed virtual screening results; T.K. and A.P. performed and  
818 analyzed molecular dynamics simulations; R.G.A. and E.N.S.J. designed the chemical  
819 library for virtual screening; C.B., A.L.L. and C.S.C. designed and synthesized the Mpro  
820 substrate. D.S., E.B.S. and A.J.O. performed Mpro and PLpro assays; J.C.O., L.V.B. and  
821 T.K. performed docking studies; P.F., D.S., L.M.P., J.H.M. and A.J.O. expressed and  
822 purified Mpro; M.A.G., B.W., and J.L.S.N. performed antiviral assays. All authors were  
823 involved in experiment design and analyses; L.H.S., T.K., R.G.A., E.B.S., E.N.S.J., and  
824 R.S.F wrote the manuscript, with revisions and contributions from all authors. E.N.S.J.  
825 and R.S.F conceived the overall design of the study.

826

827

### 7. Declaration of Competing Interest

828

829 L. H. Santos, R. G. Almeida, E. Barbosa da Silva, A. O'Donoghue, E. N. da Silva  
830 Júnior and R. S. Ferreira are inventors on a pending patent related to technology described  
831 in this work.

832

833

### 8. Acknowledgments

834

835 The authors would like to thank CNPq, CAPES (Finance Code 001) and  
836 FAPEMIG for the financial support and scholarships. E. N. da Silva Júnior acknowledges  
837 funding from CNPq (PQ 309774/2020-9), Fapemig (Rede de Pesquisa e Inovação para  
838 Bioengenharia de Nanossistemas-RED-00282-16 and PPM-00635-18), Return  
839 Fellowship of the Alexander von Humboldt Foundation (AvH) and the Royal Society of  
840 Chemistry for the research fund grant (R19-9781). R.S.F. received funding from CAPES  
841 (grant CAPES-EPIDEMIAS-0688/2020), FAPEMIG (Rede Mineira de Imunobiologicos  
842 grant # REDE-00140-16) and holds a CNPq Researcher Scholarship (Bolsa de  
843 Produtividade em Pesquisa, 306606/2017-8). J.C.O. and L.V.B. received scholarships  
844 from CAPES (processes 88887.508402/2020-00 and 88887.518393/2020-00, grant  
845 CAPES-EPIDEMIAS - Programa Estratégico Emergencial de Prevenção e Combate a  
846 Surtos, Endemias, Epidemias e Pandemias). C.B., A.L.L. and C.S.C. were supported by  
847 National Institutes of Health grant P50AI150476. The SARS-CoV-2 Mpro plasmid was  
848 provided by Rolf Hilgenfeld, University of Lübeck, Germany. Authors would also like to  
849 thank the CSC-Finland for the generous computational resources provided.

850

851

## 9. Appendix A. Supplementary data

852

853

854

855

856

857

## 10. References

858

859

860

861

862

863

864

865

866

867

868

869

870

871

872

873

874

875

876

877

878

879

880

881

882

- [1] A.E. Gorbalenya, S.C. Baker, R.S. Baric, R.J. de Groot, C. Drosten, A.A. Gulyaeva, B.L. Haagmans, C. Lauber, A.M. Leontovich, B.W. Neuman, D. Penzar, S. Perlman, L.L.M. Poon, D. V. Samborskiy, I.A. Sidorov, I. Sola, J. Ziebuhr, The species Severe acute respiratory syndrome-related coronavirus: classifying 2019-nCoV and naming it SARS-CoV-2, *Nat. Microbiol.* 5 (2020) 536–544. <https://doi.org/10.1038/s41564-020-0695-z>.
- [2] P. Zhou, X. Lou Yang, X.G. Wang, B. Hu, L. Zhang, W. Zhang, H.R. Si, Y. Zhu, B. Li, C.L. Huang, H.D. Chen, J. Chen, Y. Luo, H. Guo, R. Di Jiang, M.Q. Liu, Y. Chen, X.R. Shen, X. Wang, X.S. Zheng, K. Zhao, Q.J. Chen, F. Deng, L.L. Liu, B. Yan, F.X. Zhan, Y.Y. Wang, G.F. Xiao, Z.L. Shi, A pneumonia outbreak associated with a new coronavirus of probable bat origin, *Nature.* 579 (2020) 270–273. <https://doi.org/10.1038/s41586-020-2012-7>.
- [3] L.T. Phan, T. V. Nguyen, Q.C. Luong, T. V. Nguyen, H.T. Nguyen, H.Q. Le, T.T. Nguyen, T.M. Cao, Q.D. Pham, Importation and Human-to-Human Transmission of a Novel Coronavirus in Vietnam, *N. Engl. J. Med.* 382 (2020) 872–874. <https://doi.org/10.1056/nejmc2001272>.
- [4] M.A. Shereen, S. Khan, A. Kazmi, N. Bashir, R. Siddique, COVID-19 infection: Origin, transmission, and characteristics of human coronaviruses, *J. Adv. Res.* 24 (2020) 91–98. <https://doi.org/10.1016/j.jare.2020.03.005>.
- [5] J. Liu, X. Zheng, Q. Tong, W. Li, B. Wang, K. Sutter, M. Trilling, M. Lu, U. Dittmer, D. Yang, Overlapping and discrete aspects of the pathology and pathogenesis of the emerging human pathogenic coronaviruses SARS-CoV, MERS-CoV, and 2019-nCoV, *J. Med. Virol.* 92 (2020) 491–494. <https://doi.org/10.1002/jmv.25709>.

- 883 [6] N. Zhu, D. Zhang, W. Wang, X. Li, B. Yang, J. Song, X. Zhao, B. Huang, W.  
884 Shi, R. Lu, P. Niu, F. Zhan, X. Ma, D. Wang, W. Xu, G. Wu, G.F. Gao, W. Tan,  
885 A Novel Coronavirus from Patients with Pneumonia in China, 2019, *N. Engl. J.*  
886 *Med.* 382 (2020) 727–733. <https://doi.org/10.1056/nejmoa2001017>.
- 887 [7] N. Drayman, J.K. DeMarco, K.A. Jones, S.-A. Azizi, H.M. Froggatt, K. Tan, N.I.  
888 Maltseva, S. Chen, V. Nicolaescu, S. Dvorkin, K. Furlong, R.S. Kathayat, M.R.  
889 Firpo, V. Mastrodomenico, E.A. Bruce, M.M. Schmidt, R. Jedrzejczak, M.Á.  
890 Muñoz-Alía, B. Schuster, V. Nair, K. Han, A. O'Brien, A. Tomatsidou, B.  
891 Meyer, M. Vignuzzi, D. Missiakas, J.W. Botten, C.B. Brooke, H. Lee, S.C.  
892 Baker, B.C. Mounce, N.S. Heaton, W.E. Severson, K.E. Palmer, B.C. Dickinson,  
893 A. Joachimiak, G. Randall, S. Tay, Masitinib is a broad coronavirus 3CL  
894 inhibitor that blocks replication of SARS-CoV-2, *Science* (80-. ). (2021)  
895 eabg5827. <https://doi.org/10.1126/science.abg5827>.
- 896 [8] W. Rut, Z. Lv, M. Zmudzinski, S. Patchett, D. Nayak, S.J. Snipas, F. El Oualid,  
897 T.T. Huang, M. Bekes, M. Drag, S.K. Olsen, Activity profiling and crystal  
898 structures of inhibitor-bound SARS-CoV-2 papain-like protease: A framework  
899 for anti-COVID-19 drug design, *Sci. Adv.* 6 (2020) eabd4596.  
900 <https://doi.org/10.1126/sciadv.abd4596>.
- 901 [9] S. Ullrich, C. Nitsche, The SARS-CoV-2 main protease as drug target,  
902 *Bioorganic Med. Chem. Lett.* 30 (2020) 127377.  
903 <https://doi.org/10.1016/j.bmcl.2020.127377>.
- 904 [10] Y.M. Báez-Santos, S.E. St. John, A.D. Mesecar, The SARS-coronavirus papain-  
905 like protease: Structure, function and inhibition by designed antiviral compounds,  
906 *Antiviral Res.* 115 (2015) 21–38. <https://doi.org/10.1016/j.antiviral.2014.12.015>.
- 907 [11] C. Wu, Y. Liu, Y. Yang, P. Zhang, W. Zhong, Y. Wang, Q. Wang, Y. Xu, M. Li,  
908 X. Li, M. Zheng, L. Chen, H. Li, Analysis of therapeutic targets for SARS-CoV-  
909 2 and discovery of potential drugs by computational methods, *Acta Pharm. Sin.*  
910 *B.* 10 (2020) 766–788. <https://doi.org/10.1016/j.apsb.2020.02.008>.
- 911 [12] Y. Kim, H. Liu, A.C. Galasiti Kankanamalage, S. Weerasekara, D.H. Hua, W.C.  
912 Groutas, K.O. Chang, N.C. Pedersen, Reversal of the Progression of Fatal  
913 Coronavirus Infection in Cats by a Broad-Spectrum Coronavirus Protease  
914 Inhibitor, *PLoS Pathog.* 12 (2016) e1005531.  
915 <https://doi.org/10.1371/journal.ppat.1005531>.
- 916 [13] L. Zhang, D. Lin, Y. Kusov, Y. Nian, Q. Ma, J. Wang, A. Von Brunn, P.

- 917           Leyssen, K. Lanko, J. Neyts, A. De Wilde, E.J. Snijder, H. Liu, R. Hilgenfeld,  $\alpha$ -  
918           Ketoamides as Broad-Spectrum Inhibitors of Coronavirus and Enterovirus  
919           Replication: Structure-Based Design, Synthesis, and Activity Assessment, *J.*  
920           *Med. Chem.* 63 (2020) 4562–4578.  
921           <https://doi.org/10.1021/acs.jmedchem.9b01828>.
- 922 [14] H. Yang, W. Xie, X. Xue, K. Yang, J. Ma, W. Liang, Q. Zhao, Z. Zhou, D. Pei, J.  
923           Ziebuhr, R. Hilgenfeld, Y.Y. Kwok, L. Wong, G. Gao, S. Chen, Z. Chen, D. Ma,  
924           M. Bartlam, Z. Rao, Design of wide-spectrum inhibitors targeting coronavirus  
925           main proteases, *PLoS Biol.* 3 (2005) e324.  
926           <https://doi.org/10.1371/journal.pbio.0030324>.
- 927 [15] K. Anand, G.J. Palm, J.R. Mesters, S.G. Siddell, J. Ziebuhr, R. Hilgenfeld,  
928           Structure of coronavirus main proteinase reveals combination of a chymotrypsin  
929           fold with an extra  $\alpha$ -helical domain, *EMBO J.* 21 (2002) 3213–3224.  
930           <https://doi.org/10.1093/emboj/cdf327>.
- 931 [16] H. Yang, M. Yang, Y. Ding, Y. Liu, Z. Lou, Z. Zhou, L. Sun, L. Mo, S. Ye, H.  
932           Pang, G.F. Gao, K. Anand, M. Bartlam, R. Hilgenfeld, Z. Rao, The crystal  
933           structures of severe acute respiratory syndrome virus main protease and its  
934           complex with an inhibitor, *Proc. Natl. Acad. Sci. U. S. A.* 100 (2003) 13190–  
935           13195. <https://doi.org/10.1073/pnas.1835675100>.
- 936 [17] X. Xue, H. Yu, H. Yang, F. Xue, Z. Wu, W. Shen, J. Li, Z. Zhou, Y. Ding, Q.  
937           Zhao, X.C. Zhang, M. Liao, M. Bartlam, Z. Rao, Structures of Two Coronavirus  
938           Main Proteases: Implications for Substrate Binding and Antiviral Drug Design, *J.*  
939           *Virology*. 82 (2008) 2515–2527. <https://doi.org/10.1128/jvi.02114-07>.
- 940 [18] T. Pillaiyar, M. Manickam, V. Namasivayam, Y. Hayashi, S.H. Jung, An  
941           overview of severe acute respiratory syndrome-coronavirus (SARS-CoV) 3CL  
942           protease inhibitors: Peptidomimetics and small molecule chemotherapy, *J. Med.*  
943           *Chem.* 59 (2016) 6595–6628. <https://doi.org/10.1021/acs.jmedchem.5b01461>.
- 944 [19] W. Dai, B. Zhang, X.M. Jiang, H. Su, J. Li, Y. Zhao, X. Xie, Z. Jin, J. Peng, F.  
945           Liu, C. Li, Y. Li, F. Bai, H. Wang, X. Cheng, X. Cen, S. Hu, X. Yang, J. Wang,  
946           X. Liu, G. Xiao, H. Jiang, Z. Rao, L.K. Zhang, Y. Xu, H. Yang, H. Liu,  
947           Structure-based design of antiviral drug candidates targeting the SARS-CoV-2  
948           main protease, *Science* (80-. ). 368 (2020) 1331–1335.  
949           <https://doi.org/10.1126/science.abb4489>.
- 950 [20] M.D. Sacco, C. Ma, P. Lagarias, A. Gao, J.A. Townsend, X. Meng, P. Dube, X.

- 951 Zhang, Y. Hu, N. Kitamura, B. Hurst, B. Tarbet, M.T. Marty, A. Kolocouris, Y.  
952 Xiang, Y. Chen, J. Wang, Structure and inhibition of the SARS-CoV-2 main  
953 protease reveal strategy for developing dual inhibitors against Mpro and  
954 cathepsin L, *Sci. Adv.* 6 (2020) eabe0751.  
955 <https://doi.org/10.1126/sciadv.abe0751>.
- 956 [21] H.C. Hung, Y.Y. Ke, S.Y. Huang, P.N. Huang, Y.A. Kung, T.Y. Chang, K.J.  
957 Yen, T.T. Peng, S.E. Chang, C.T. Huang, Y.R. Tsai, S.H. Wu, S.J. Lee, J.H. Lin,  
958 B.S. Liu, W.C. Sung, S.R. Shih, C.T. Chen, J.T.A. Hsu, Discovery of M protease  
959 inhibitors encoded by SARS-CoV-2, *Antimicrob. Agents Chemother.* 64 (2020).  
960 <https://doi.org/10.1128/AAC.00872-20>.
- 961 [22] L. Zhang, D. Lin, X. Sun, U. Curth, C. Drosten, L. Sauerhering, S. Becker, K.  
962 Rox, R. Hilgenfeld, Crystal structure of SARS-CoV-2 main protease provides a  
963 basis for design of improved a-ketoamide inhibitors, *Science* (80-. ). 368 (2020)  
964 409–412. <https://doi.org/10.1126/science.abb3405>.
- 965 [23] C. Ma, M.D. Sacco, B. Hurst, J.A. Townsend, Y. Hu, T. Szeto, X. Zhang, B.  
966 Tarbet, M.T. Marty, Y. Chen, J. Wang, Boceprevir, GC-376, and calpain  
967 inhibitors II, XII inhibit SARS-CoV-2 viral replication by targeting the viral  
968 main protease, *Cell Res.* 30 (2020) 678–692. [https://doi.org/10.1038/s41422-020-](https://doi.org/10.1038/s41422-020-0356-z)  
969 [0356-z](https://doi.org/10.1038/s41422-020-0356-z).
- 970 [24] Z. Jin, X. Du, Y. Xu, Y. Deng, M. Liu, Y. Zhao, B. Zhang, X. Li, L. Zhang, C.  
971 Peng, Structure of M pro from SARS-CoV-2 and discovery of its inhibitors,  
972 *Nature.* 582 (2020) 289–293.
- 973 [25] C.-H. Zhang, E.A. Stone, M. Deshmukh, J.A. Ippolito, M.M. Ghahremanpour, J.  
974 Tirado-Rives, K.A. Spasov, S. Zhang, Y. Takeo, S.N. Kudalkar, Z. Liang, F.  
975 Isaacs, B. Lindenbach, S.J. Miller, K.S. Anderson, W.L. Jorgensen, Potent  
976 Noncovalent Inhibitors of the Main Protease of SARS-CoV-2 from Molecular  
977 Sculpting of the Drug Perampanel Guided by Free Energy Perturbation  
978 Calculations, *ACS Cent. Sci.* 7 (2021) 467–475.  
979 <https://doi.org/10.1021/acscentsci.1c00039>.
- 980 [26] H. Su, S. Yao, W. Zhao, Y. Zhang, J. Liu, Q. Shao, Q. Wang, M. Li, H. Xie, W.  
981 Shang, C. Ke, L. Feng, X. Jiang, J. Shen, G. Xiao, H. Jiang, L. Zhang, Y. Ye, Y.  
982 Xu, Identification of pyrogallol as a warhead in design of covalent inhibitors for  
983 the SARS-CoV-2 3CL protease, *Nat. Commun.* 12 (2021) 3623.  
984 <https://doi.org/10.1038/s41467-021-23751-3>.

- 985 [27] R. Oerlemans, A.J. Ruiz-Moreno, Y. Cong, N. Dinesh Kumar, M.A. Velasco-  
986 Velazquez, C.G. Neochoritis, J. Smith, F. Reggiori, M.R. Groves, A. Dömling,  
987 Repurposing the HCV NS3-4A protease drug boceprevir as COVID-19  
988 therapeutics, *RSC Med. Chem.* 12 (2021) 370–379.  
989 <https://doi.org/10.1039/d0md00367k>.
- 990 [28] D.W. Kneller, G. Phillips, K.L. Weiss, Q. Zhang, L. Coates, A. Kovalevsky,  
991 Direct Observation of Protonation State Modulation in SARS-CoV-2 Main  
992 Protease upon Inhibitor Binding with Neutron Crystallography, *J. Med. Chem.* 64  
993 (2021) 4991–5000. <https://doi.org/10.1021/acs.jmedchem.1c00058>.
- 994 [29] S. Günther, P.Y.A. Reinke, Y. Fernández-García, J. Lieske, T.J. Lane, H.M.  
995 Ginn, F.H.M. Koua, C. Ehrt, W. Ewert, D. Oberthuer, X-ray screening identifies  
996 active site and allosteric inhibitors of SARS-CoV-2 main protease, *Science* (80-  
997 ). (2021).
- 998 [30] D.R. Owen, C.M.N. Allerton, A.S. Anderson, L. Aschenbrenner, M. Avery, S.  
999 Berritt, B. Boras, R.D. Cardin, A. Carlo, K.J. Coffman, A. Dantonio, L. Di, H.  
1000 Eng, R. Ferre, K.S. Gajiwala, S.A. Gibson, S.E. Greasley, B.L. Hurst, E.P.  
1001 Kadar, A.S. Kalgutkar, J.C. Lee, J. Lee, W. Liu, S.W. Mason, S. Noell, J.J.  
1002 Novak, R.S. Obach, K. Ogilvie, N.C. Patel, M. Pettersson, D.K. Rai, M.R. Reese,  
1003 M.F. Sammons, J.G. Sathish, R.S.P. Singh, C.M. Stepan, A.E. Stewart, J.B.  
1004 Tuttle, L. Updyke, P.R. Verhoest, L. Wei, Q. Yang, Y. Zhu, An oral SARS-  
1005 CoV-2 M pro inhibitor clinical candidate for the treatment of COVID-19 ,  
1006 *Science* (80-. ). 0 (2021) eab14784. <https://doi.org/10.1126/science.ab14784>.
- 1007 [31] R. Robbins, Pfizer Says Its Antiviral Pill is Highly Effective in Treating Covid,  
1008 *New York Times*. (2021). [https://www.nytimes.com/2021/11/05/health/pfizer-](https://www.nytimes.com/2021/11/05/health/pfizer-covid-pill.html)  
1009 [covid-pill.html](https://www.nytimes.com/2021/11/05/health/pfizer-covid-pill.html).
- 1010 [32] Y.M. Báez-Santos, S.J. Barraza, M.W. Wilson, M.P. Agius, A.M. Mielech, N.M.  
1011 Davis, S.C. Baker, S.D. Larsen, A.D. Mesecar, X-ray structural and biological  
1012 evaluation of a series of potent and highly selective inhibitors of human  
1013 coronavirus papain-like proteases, *J. Med. Chem.* 57 (2014) 2393–2412.  
1014 <https://doi.org/10.1021/jm401712t>.
- 1015 [33] K. Ratia, S. Pegan, J. Takayama, K. Sleeman, M. Coughlin, S. Baliji, R.  
1016 Chaudhuri, W. Fu, B.S. Prabhakar, M.E. Johnson, S.C. Baker, A.K. Ghosh, A.D.  
1017 Mesecar, A noncovalent class of papain-like protease/deubiquitinase inhibitors  
1018 blocks SARS virus replication, *Proc. Natl. Acad. Sci. U. S. A.* 105 (2008) 16119–



- 1019 16124. <https://doi.org/10.1073/pnas.0805240105>.
- 1020 [34] M.H. Lin, D.C. Moses, C.H. Hsieh, S.C. Cheng, Y.H. Chen, C.Y. Sun, C.Y.  
1021 Chou, Disulfiram can inhibit MERS and SARS coronavirus papain-like proteases  
1022 via different modes, *Antiviral Res.* 150 (2018) 155–163.  
1023 <https://doi.org/10.1016/j.antiviral.2017.12.015>.
- 1024 [35] J. Lei, Y. Kusov, R. Hilgenfeld, Nsp3 of coronaviruses: Structures and functions  
1025 of a large multi-domain protein, *Antiviral Res.* 149 (2018) 58–74.  
1026 <https://doi.org/10.1016/j.antiviral.2017.11.001>.
- 1027 [36] L.A. Armstrong, S.M. Lange, V.D. Cesare, S.P. Matthews, R.S. Nirujogi, I. Cole,  
1028 A. Hope, F. Cunningham, R. Toth, R. Mukherjee, D. Bojkova, F. Gruber, D.  
1029 Gray, P.G. Wyatt, J. Cinatl, I. Dikic, P. Davies, Y. Kulathu, Biochemical  
1030 characterization of protease activity of Nsp3 from SARS-CoV-2 and its  
1031 inhibition by nanobodies, *PLoS One.* 16 (2021) e0253364.  
1032 <https://doi.org/10.1371/journal.pone.0253364>.
- 1033 [37] J. Osipiuk, S.A. Azizi, S. Dvorkin, M. Endres, R. Jedrzejczak, K.A. Jones, S.  
1034 Kang, R.S. Kathayat, Y. Kim, V.G. Lisnyak, S.L. Maki, V. Nicolaescu, C.A.  
1035 Taylor, C. Tesar, Y.A. Zhang, Z. Zhou, G. Randall, K. Michalska, S.A. Snyder,  
1036 B.C. Dickinson, A. Joachimiak, Structure of papain-like protease from SARS-  
1037 CoV-2 and its complexes with non-covalent inhibitors, *Nat. Commun.* 12 (2021)  
1038 1–9. <https://doi.org/10.1038/s41467-021-21060-3>.
- 1039 [38] Z. Fu, B. Huang, J. Tang, S. Liu, M. Liu, Y. Ye, Z. Liu, Y. Xiong, W. Zhu, D.  
1040 Cao, J. Li, X. Niu, H. Zhou, Y.J. Zhao, G. Zhang, H. Huang, The complex  
1041 structure of GRL0617 and SARS-CoV-2 PLpro reveals a hot spot for antiviral  
1042 drug discovery, *Nat. Commun.* 12 (2021) 1–12. [https://doi.org/10.1038/s41467-](https://doi.org/10.1038/s41467-020-20718-8)  
1043 [020-20718-8](https://doi.org/10.1038/s41467-020-20718-8).
- 1044 [39] H. Shan, J. Liu, J. Shen, J. Dai, G. Xu, K. Lu, C. Han, Y. Wang, X. Xu, Y. Tong,  
1045 H. Xiang, Z. Ai, G. Zhuang, J. Hu, Z. Zhang, Y. Li, L. Pan, L. Tan, Development  
1046 of potent and selective inhibitors targeting the papain-like protease of SARS-  
1047 CoV-2, *Cell Chem. Biol.* 28 (2021) 855-865.e9.  
1048 <https://doi.org/10.1016/j.chembiol.2021.04.020>.
- 1049 [40] Z. Shen, K. Ratia, L. Cooper, D. Kong, H. Lee, Y. Kwon, Y. Li, S. Alqarni, F.  
1050 Huang, O. Dubrovskiy, L. Rong, G.R.J. Thatcher, R. Xiong, Design of SARS-  
1051 CoV-2 PLpro Inhibitors for COVID-19 Antiviral Therapy Leveraging Binding  
1052 Cooperativity, *J. Med. Chem.* (2021).

- 1053 <https://doi.org/10.1021/acs.jmedchem.1c01307>.
- 1054 [41] X. Gao, B. Qin, P. Chen, K. Zhu, P. Hou, J.A. Wojdyla, M. Wang, S. Cui,  
1055 Crystal structure of SARS-CoV-2 papain-like protease, *Acta Pharm. Sin. B.* 11  
1056 (2021) 237–245.
- 1057 [42] T. Klemm, G. Ebert, D. Calleja, C. Allison, L. Richardson, J. Bernardini, B. Lu,  
1058 N. Kuchel, C. Grohmann, Y. Shibata, Z.Y. Gan, J. Cooney, M. Doerflinger, A.  
1059 Au, T. Blackmore, P. Geurink, H. Ovaa, J. Newman, A. Riboldi-Tunnicliffe, P.  
1060 Czabotar, J. Mitchell, R. Feltham, B. Lechtenberg, K. Lowes, G. Dewson, M.  
1061 Pellegrini, G. Lessene, D. Komander, Mechanism and inhibition of SARS-CoV-2  
1062 PLpro, *EMBO J.* 39 (2020) e106275. <https://doi.org/10.1101/2020.06.18.160614>.
- 1063 [43] S. Pushpakom, F. Iorio, P.A. Eyers, K.J. Escott, S. Hopper, A. Wells, A. Doig, T.  
1064 Williams, J. Latimer, C. McNamee, Drug repurposing: progress, challenges and  
1065 recommendations, *Nat. Rev. Drug Discov.* 18 (2019) 41–58.
- 1066 [44] G. Li, E. De Clercq, Therapeutic options for the 2019 novel coronavirus (2019-  
1067 nCoV), *Nat. Rev. Drug Discov.* 19 (2020) 149–150.  
1068 <https://doi.org/10.1038/d41573-020-00016-0>.
- 1069 [45] E.H.G. da Cruz, C.M.B. Hussene, G.G. Dias, E.B.T. Diogo, I.M.M. de Melo,  
1070 B.L. Rodrigues, M.G. da Silva, W.O. Valença, C.A. Camara, R.N. de Oliveira,  
1071 Y.G. de Paiva, M.O.F. Goulart, B.C. Cavalcanti, C. Pessoa, E.N. da Silva Júnior,  
1072 1,2,3-Triazole-, arylamino- and thio-substituted 1,4-naphthoquinones: Potent  
1073 antitumor activity, electrochemical aspects, and bioisosteric replacement of C-  
1074 ring-modified lapachones, *Bioorganic Med. Chem.* 22 (2014) 1608–1619.  
1075 <https://doi.org/10.1016/j.bmc.2014.01.033>.
- 1076 [46] R.L. de Carvalho, G.A.M. Jardim, A.C.C. Santos, M.H. Araujo, W.X.C. Oliveira,  
1077 A.C.S. Bombaça, R.F.S. Menna-Barreto, E. Gopi, E. Gravel, E. Doris, E.N. da  
1078 Silva Júnior, Combination of Aryl Diselenides/Hydrogen Peroxide and Carbon-  
1079 Nanotube/Rhodium Nanohybrids for Naphthol Oxidation: An Efficient Route  
1080 towards Trypanocidal Quinones, *Chemistry.* 24 (2018) 15227–15235.  
1081 <https://doi.org/10.1002/chem.201802773>.
- 1082 [47] G.A.M. Jardim, T.L. Silva, M.O.F. Goulart, C.A. de Simone, J.M.C. Barbosa, K.  
1083 Salomão, S.L. de Castro, J.F. Bower, E.N. da Silva Júnior, Rhodium-catalyzed C-  
1084 H bond activation for the synthesis of quinonoid compounds: Significant Anti-  
1085 Trypanosoma cruzi activities and electrochemical studies of functionalized  
1086 quinones, *Eur. J. Med. Chem.* 136 (2017) 406–419.

- 1087 <https://doi.org/10.1016/j.ejmech.2017.05.011>.
- 1088 [48] D.M. Mellott, C. Te Tseng, A. Drelich, P. Fajtová, B.C. Chenna, D.H.  
1089 Kostomiris, J. Hsu, J. Zhu, Z.W. Taylor, K.I. Kocurek, V. Tat, A. Katzfuss, L. Li,  
1090 M.A. Giardini, D. Skinner, K. Hirata, M.C. Yoon, S. Beck, A.F. Carlin, A.E.  
1091 Clark, L. Beretta, D. Maneval, V. Hook, F. Frueh, B.L. Hurst, H. Wang, F.M.  
1092 Raushel, A.J. O'Donoghue, J.L. De Siqueira-Neto, T.D. Meek, J.H. McKerrow,  
1093 A Clinical-Stage Cysteine Protease Inhibitor blocks SARS-CoV-2 Infection of  
1094 Human and Monkey Cells, *ACS Chem. Biol.* 16 (2021) 642–650.  
1095 <https://doi.org/10.1021/acscchembio.0c00875>.
- 1096 [49] R. Lu, X. Zhao, J. Li, P. Niu, B. Yang, H. Wu, W. Wang, H. Song, B. Huang, N.  
1097 Zhu, Y. Bi, X. Ma, F. Zhan, L. Wang, T. Hu, H. Zhou, Z. Hu, W. Zhou, L. Zhao,  
1098 J. Chen, Y. Meng, J. Wang, Y. Lin, J. Yuan, Z. Xie, J. Ma, W.J. Liu, D. Wang,  
1099 W. Xu, E.C. Holmes, G.F. Gao, G. Wu, W. Chen, W. Shi, W. Tan, Genomic  
1100 characterisation and epidemiology of 2019 novel coronavirus: implications for  
1101 virus origins and receptor binding, *Lancet.* 395 (2020) 565–574.  
1102 [https://doi.org/10.1016/S0140-6736\(20\)30251-8](https://doi.org/10.1016/S0140-6736(20)30251-8).
- 1103 [50] Gilead Sciences Inc, Gilead's Investigational Antiviral Remdesivir Receives U.S.  
1104 Food and Drug Administration Emergency Use Authorization for the Treatment  
1105 of COVID-19, <https://www.gilead.com/>. (2020).  
1106 [https://www.gilead.com/news-and-press/press-room/press-](https://www.gilead.com/news-and-press/press-room/press-releases/2020/5/gileads-investigational-antiviral-remdesivir-receives-us-food-and-drug-administration-emergency-use-authorization-for-the-treatment-of-covid19)  
1107 [releases/2020/5/gileads-investigational-antiviral-remdesivir-receives-us-food-](https://www.gilead.com/news-and-press/press-room/press-releases/2020/5/gileads-investigational-antiviral-remdesivir-receives-us-food-and-drug-administration-emergency-use-authorization-for-the-treatment-of-covid19)  
1108 [and-drug-administration-emergency-use-authorization-for-the-treatment-of-](https://www.gilead.com/news-and-press/press-room/press-releases/2020/5/gileads-investigational-antiviral-remdesivir-receives-us-food-and-drug-administration-emergency-use-authorization-for-the-treatment-of-covid19)  
1109 [covid19](https://www.gilead.com/news-and-press/press-room/press-releases/2020/5/gileads-investigational-antiviral-remdesivir-receives-us-food-and-drug-administration-emergency-use-authorization-for-the-treatment-of-covid19) (accessed April 21, 2021).
- 1110 [51] Federation Drug American (FDA), Fact Sheet for Health Care Providers  
1111 Emergency Use Authorization of Bamlanivimab and Etesevimab,  
1112 <http://www.fda.gov/>. (2020) 1–36.  
1113 [https://www.cdc.gov/growthcharts/clinical\\_charts.htm%0Ahttps://www.cdc.gov/](https://www.cdc.gov/growthcharts/clinical_charts.htm%0Ahttps://www.cdc.gov/growthcharts/clinical_charts.htm,%0Ahttps://www.fda.gov/media/137566/download)  
1114 [growthcharts/clinical\\_charts.htm,%0Ahttps://www.fda.gov/media/137566/downl](https://www.cdc.gov/growthcharts/clinical_charts.htm,%0Ahttps://www.fda.gov/media/137566/download)  
1115 [oad](https://www.cdc.gov/growthcharts/clinical_charts.htm,%0Ahttps://www.fda.gov/media/137566/download) (accessed April 21, 2021).
- 1116 [52] J. Pardo, A.M. Shukla, G. Chamarthi, A. Gupte, The journey of remdesivir: From  
1117 Ebola to COVID-19, *Drugs Context.* 9 (2020). [https://doi.org/10.7573/DIC.2020-](https://doi.org/10.7573/DIC.2020-4-14)  
1118 [4-14](https://doi.org/10.7573/DIC.2020-4-14).
- 1119 [53] J.H. Beigel, K.M. Tomashek, L.E. Dodd, A.K. Mehta, B.S. Zingman, A.C. Kalil,  
1120 E. Hohmann, H.Y. Chu, A. Luetkemeyer, S. Kline, D. Lopez de Castilla, R.W.

- 1121 Finberg, K. Dierberg, V. Tapson, L. Hsieh, T.F. Patterson, R. Paredes, D.A.  
1122 Sweeney, W.R. Short, G. Touloumi, D.C. Lye, N. Ohmagari, M. Oh, G.M. Ruiz-  
1123 Palacios, T. Benfield, G. Fätkenheuer, M.G. Kortepeter, R.L. Atmar, C.B.  
1124 Creech, J. Lundgren, A.G. Babiker, S. Pett, J.D. Neaton, T.H. Burgess, T.  
1125 Bonnett, M. Green, M. Makowski, A. Osinusi, S. Nayak, H.C. Lane, Remdesivir  
1126 for the Treatment of Covid-19 — Final Report, *N. Engl. J. Med.* 383 (2020)  
1127 1813–1826. <https://doi.org/10.1056/nejmoa2007764>.
- 1128 [54] E.K. McCreary, J.M. Pogue, Coronavirus disease 2019 treatment: A review of  
1129 early and emerging options, in: *Open Forum Infect. Dis.*, Oxford University Press  
1130 US, 2020: p. ofaa105. <https://doi.org/10.1093/ofid/ofaa105>.
- 1131 [55] M.S. Hossan, A. Fatima, M. Rahmatullah, T.J. Khoo, V. Nissapatorn, A. V.  
1132 Galochkina, A. V. Slita, A.A. Shtro, Y. Nikolaeva, V. V. Zarubaev, C. Wiart,  
1133 Antiviral activity of *Embelia ribes* Burm. f. against influenza virus in vitro, *Arch.*  
1134 *Virol.* 163 (2018) 2121–2131. <https://doi.org/10.1007/s00705-018-3842-6>.
- 1135 [56] M.K. Parvez, M. Tabish Rehman, P. Alam, M.S. Al-Dosari, S.I. Alqasoumi, M.F.  
1136 Alajmi, Plant-derived antiviral drugs as novel hepatitis B virus inhibitors: Cell  
1137 culture and molecular docking study, *Saudi Pharm. J.* 27 (2019) 389–400.  
1138 <https://doi.org/10.1016/j.jsps.2018.12.008>.
- 1139 [57] F. Caruso, M. Rossi, J.Z. Pedersen, S. Incerpi, Computational studies reveal  
1140 mechanism by which quinone derivatives can inhibit SARS-CoV-2. Study of  
1141 embelin and two therapeutic compounds of interest, methyl prednisolone and  
1142 dexamethasone, *J. Infect. Public Health.* 13 (2020) 1868–1877.  
1143 <https://doi.org/10.1016/j.jiph.2020.09.015>.
- 1144 [58] Y.B. Ryu, S.J. Park, Y.M. Kim, J.Y. Lee, W.D. Seo, J.S. Chang, K.H. Park, M.C.  
1145 Rho, W.S. Lee, SARS-CoV 3CLpro inhibitory effects of quinone-methide  
1146 triterpenes from *Tripterygium regelii*, *Bioorganic Med. Chem. Lett.* 20 (2010)  
1147 1873–1876. <https://doi.org/10.1016/j.bmcl.2010.01.152>.
- 1148 [59] E.N. da Silva Júnior, M.C.B.V. de Souza, A. V. Pinto, M. do C.F.R. Pinto,  
1149 M.O.F. Goulart, F.W.A. Barros, C. Pessoa, L. V. Costa-Lotufo, R.C.  
1150 Montenegro, M.O. de Moraes, V.F. Ferreira, Synthesis and potent antitumor  
1151 activity of new arylamino derivatives of nor- $\beta$ -lapachone and nor- $\alpha$ -lapachone,  
1152 *Bioorganic Med. Chem.* 15 (2007) 7035–7041.  
1153 <https://doi.org/10.1016/j.bmc.2007.07.043>.
- 1154 [60] E.N. da Silva Júnior, M.C.B.V. de Souza, M.C. Fernandes, R.F.S. Menna-

- 1155 Barreto, M. do C.F.R. Pinto, F. de Assis Lopes, C.A. de Simone, C.K.Z.  
1156 Andrade, A. V. Pinto, V.F. Ferreira, S.L. de Castro, Synthesis and anti-  
1157 Trypanosoma cruzi activity of derivatives from nor-lapachones and lapachones,  
1158 Bioorganic Med. Chem. 16 (2008) 5030–5038.  
1159 <https://doi.org/10.1016/j.bmc.2008.03.032>.
- 1160 [61] E.N. da Silva Júnior, T.T. Guimarães, R.F.S. Menna-Barreto, M. do C.F.R. Pinto,  
1161 C.A. de Simone, C. Pessoa, B.C. Cavalcanti, J.R. Sabino, C.K.Z. Andrade,  
1162 M.O.F. Goulart, S.L. de Castro, A. V. Pinto, The evaluation of quinonoid  
1163 compounds against Trypanosoma cruzi: Synthesis of imidazolic anthraquinones,  
1164 nor- $\beta$ -lapachone derivatives and  $\beta$ -lapachone-based 1,2,3-triazoles, Bioorganic  
1165 Med. Chem. 18 (2010) 3224–3230. <https://doi.org/10.1016/j.bmc.2010.03.029>.
- 1166 [62] E.N. da Silva Júnior, C.F. de Deus, B.C. Cavalcanti, C. Pessoa, L. V. Costa-  
1167 Lotufo, R.C. Montenegro, M.O. de Moraes, M.D.C.F.R. Pinto, C.A. de Simone,  
1168 V.F. Ferreira, M.O.F. Goulart, C.K.Z. Andrade, A. V. Pinto, 3-Arylamino and 3-  
1169 alkoxy-nor- $\beta$ -lapachone Derivatives: Synthesis and Cytotoxicity against Cancer  
1170 Cell Lines, J. Med. Chem. 53 (2010) 504–508.  
1171 <https://doi.org/10.1021/jm900865m>.
- 1172 [63] A.A. de Souza, M.A.B.F. de Moura, F.C. de Abreu, M.O.F. Goulart, E.N. da  
1173 Silva Jr., A. V. Pinto, V.F. Ferreira, R. Moscoso, L.J. Núñez-Vergara, J.A.  
1174 Squella, Electrochemical study, on mercury, of a Meta-nitroarylamine derivative  
1175 of nor- $\beta$ -lapachone, an antitumor and trypanocidal compound, Quim. Nova. 33  
1176 (2010) 2075–2079. <https://doi.org/10.1590/s0100-40422010001000013>.
- 1177 [64] E.H.G. da Cruz, M.A. Silvers, G.A.M. Jardim, J.M. Resende, B.C. Cavalcanti,  
1178 I.S. Bomfim, C. Pessoa, C.A. de Simone, G. V. Botteselle, A.L. Braga, D.K.  
1179 Nair, I.N.N. Namboothiri, D.A. Boothman, E.N. da Silva Júnior, Synthesis and  
1180 antitumor activity of selenium-containing quinone-based triazoles possessing two  
1181 redox centres, and their mechanistic insights, Eur. J. Med. Chem. 122 (2016) 1–  
1182 16. <https://doi.org/10.1016/j.ejmech.2016.06.019>.
- 1183 [65] A.A. Vieira, I.R. Brandão, W.O. Valença, C.A. de Simone, B.C. Cavalcanti, C.  
1184 Pessoa, T.R. Carneiro, A.L. Braga, E.N. da Silva, Hybrid compounds with two  
1185 redox centres: Modular synthesis of chalcogen-containing lapachones and studies  
1186 on their antitumor activity, Eur. J. Med. Chem. 101 (2015) 254–265.  
1187 <https://doi.org/10.1016/j.ejmech.2015.06.044>.
- 1188 [66] A. Kharma, C. Jacob, Í.A.O. Bozzi, G.A.M. Jardim, A.L. Braga, K. Salomão,

- 1189 C.C. Gatto, M.F.S. Silva, C. Pessoa, M. Stangier, L. Ackermann, E.N. da Silva  
1190 Júnior, Electrochemical Selenation/Cyclization of Quinones: A Rapid, Green and  
1191 Efficient Access to Functionalized Trypanocidal and Antitumor Compounds,  
1192 *European J. Org. Chem.* 2020 (2020) 4474–4486.  
1193 <https://doi.org/10.1002/ejoc.202000216>.
- 1194 [67] R.G. Almeida, W.O. Valença, L.G. Rosa, C.A. de Simone, S.L. de Castro, J.M.C.  
1195 Barbosa, D.P. Pinheiro, C.R.K. Paier, G.G.C. de Carvalho, C. Pessoa, M.O.F.  
1196 Goulart, A. Kharma, E.N. da Silva Júnior, Synthesis of quinone imine and  
1197 sulphur-containing compounds with antitumor and trypanocidal activities: Redox  
1198 and biological implications, *RSC Med. Chem.* 11 (2020) 1145–1160.  
1199 <https://doi.org/10.1039/d0md00072h>.
- 1200 [68] G.A.M. Jardim, T.T. Guimarães, M.D.C.F.R. Pinto, B.C. Cavalcanti, K.M. de  
1201 Farias, C. Pessoa, C.C. Gatto, D.K. Nair, I.N.N. Namboothiri, E.N. da Silva  
1202 Júnior, Naphthoquinone-based chalcone hybrids and derivatives: Synthesis and  
1203 potent activity against cancer cell lines, *Med. Chem. Commun.* 6 (2015) 120–  
1204 150. <https://doi.org/10.1039/c4md00371c>.
- 1205 [69] B.C. Cavalcanti, I.O. Cabral, F.A.R. Rodrigues, F.W.A. Barros, D.D. Rocha,  
1206 H.I.F. Magalhães, D.J. Moura, J. Saffi, J.A.P. Henriques, T.S.C. Carvalho, M.O.  
1207 Moraes, C. Pessoa, I.M.M. de Melo, E.N. da Silva Júnior, Potent antileukemic  
1208 action of naphthoquinoidal compounds: Evidence for an intrinsic death  
1209 mechanism based on oxidative stress and inhibition of DNA repair, *J. Braz.*  
1210 *Chem. Soc.* 24 (2013) 145–163. [https://doi.org/10.1590/S0103-](https://doi.org/10.1590/S0103-50532013000100019)  
1211 [50532013000100019](https://doi.org/10.1590/S0103-50532013000100019).
- 1212 [70] S.L. de Castro, F.S. Emery, E.N. da Silva Júnior, Synthesis of quinoidal  
1213 molecules: Strategies towards bioactive compounds with an emphasis on  
1214 lapachones, *Eur. J. Med. Chem.* 69 (2013) 678–700.  
1215 <https://doi.org/10.1016/j.ejmech.2013.07.057>.
- 1216 [71] G.A.M. Jardim, W.J. Reis, M.F. Ribeiro, F.M. Ottoni, R.J. Alves, T.L. Silva,  
1217 M.O.F. Goulart, A.L. Braga, R.F.S. Menna-Barreto, K. Salomão, S.L. de Castro,  
1218 E.N. da Silva Júnior, On the investigation of hybrid quinones: Synthesis,  
1219 electrochemical studies and evaluation of trypanocidal activity, *RSC Adv.* 5  
1220 (2015) 78047–78060. <https://doi.org/10.1039/c5ra16213k>.
- 1221 [72] G.G. Dias, T. Rogge, R. Kuniyil, C. Jacob, R.F.S. Menna-Barreto, E.N. da Silva  
1222 Júnior, L. Ackermann, Ruthenium-catalyzed C-H oxygenation of quinones by

- 1223 weak O-coordination for potent trypanocidal agents, *Chem. Commun.* 54 (2018)  
1224 12840–12843. <https://doi.org/10.1039/c8cc07572g>.
- 1225 [73] T. V. Baiju, R.G. Almeida, S.T. Sivanandan, C.A. de Simone, L.M. Brito, B.C.  
1226 Cavalcanti, C. Pessoa, I.N.N. Namboothiri, E.N. da Silva Júnior, Quinonoid  
1227 compounds via reactions of lawsone and 2-aminonaphthoquinone with  $\alpha$ -  
1228 bromonitroalkenes and nitroallylic acetates: Structural diversity by C-ring  
1229 modification and cytotoxic evaluation against cancer cells, *Eur. J. Med. Chem.*  
1230 151 (2018) 686–704. <https://doi.org/10.1016/j.ejmech.2018.03.079>.
- 1231 [74] H. Suginome, A. Konishi, H. Sakurai, H. Minakawa, T. Takeda, H. Senboku, M.  
1232 Tokuda, K. Kobayashi, Photoinduced molecular transformations. Part 156. New  
1233 photoadditions of 2-hydroxy-1,4-naphthoquinones with naphthols and their  
1234 derivatiyes, *Tetrahedron.* 51 (1995) 1377–1386. [https://doi.org/10.1016/0040-](https://doi.org/10.1016/0040-4020(94)01026-V)  
1235 [4020\(94\)01026-V](https://doi.org/10.1016/0040-4020(94)01026-V).
- 1236 [75] J.M. Wood, N.S. Satam, R.G. Almeida, V.S. Cristani, D.P. de Lima, L. Dantas-  
1237 Pereira, K. Salomão, R.F.S. Menna-Barreto, I.N.N. Namboothiri, J.F. Bower,  
1238 E.N. da Silva Júnior, Strategies towards potent trypanocidal drugs: Application of  
1239 Rh-catalyzed [2 + 2 + 2] cycloadditions, sulfonyl phthalide annulation and  
1240 nitroalkene reactions for the synthesis of substituted quinones and their  
1241 evaluation against *Trypanosoma cruzi*, *Bioorganic Med. Chem.* 28 (2020)  
1242 115565. <https://doi.org/10.1016/j.bmc.2020.115565>.
- 1243 [76] E.N. da Silva Júnior, R.L. de Carvalho, R.G. Almeida, L.G. Rosa, F. Fantuzzi, T.  
1244 Rogge, P.M.S. Costa, C. Pessoa, C. Jacob, L. Ackermann, Ruthenium(II)-  
1245 Catalyzed Double Annulation of Quinones: Step-Economical Access to Valuable  
1246 Bioactive Compounds, *Chem. - A Eur. J.* 26 (2020) 10981–10986.  
1247 <https://doi.org/10.1002/chem.202001434>.
- 1248 [77] V.K. Tandon, D.B. Yadav, R. V. Singh, M. Vaish, A.K. Chaturvedi, P.K. Shukla,  
1249 Synthesis and biological evaluation of novel 1,4-naphthoquinone derivatives as  
1250 antibacterial and antiviral agents, *Bioorganic Med. Chem. Lett.* 15 (2005) 3463–  
1251 3466. <https://doi.org/10.1016/j.bmcl.2005.04.075>.
- 1252 [78] G. Krishnamoorthy, S.P. Webb, T. Nguyen, P.K. Chowdhury, M. Halder, N.J.  
1253 Wills, S. Carpenter, G.A. Kraus, M.S. Gordon, J.W. Petrich, Synthesis of  
1254 hydroxy and methoxy perylene quinones, their spectroscopic and computational  
1255 characterization, and their antiviral activity, *Photochem. Photobiol.* 81 (2005)  
1256 924. <https://doi.org/10.1562/2004-11-23-ra-378r1.1>.

- 1257 [79] L.R. Silva, A.S. Guimarães, J. do Nascimento, I.J. do Santos Nascimento, E.B. da  
1258 Silva, J.H. McKerrow, S.H. Cardoso, E.F. da Silva-Júnior, Computer-aided  
1259 design of 1, 4-naphthoquinone-based inhibitors targeting cruzain and rhodesain  
1260 cysteine proteases, *Bioorg. Med. Chem.* 41 (2021) 116213.
- 1261 [80] E.N. da Silva Jr., R.F.S. Menna-Barreto, M. do C.F.R. Pinto, R.S.F. Silva, D. V.  
1262 Teixeira, M.C.B.V. de Souza, C.A. De Simone, S.L. De Castro, V.F. Ferreira, A.  
1263 V. Pinto, Naphthoquinoidal [1,2,3]-triazole, a new structural moiety active  
1264 against *Trypanosoma cruzi*, *Eur. J. Med. Chem.* 43 (2008) 1774–1780.  
1265 <https://doi.org/10.1016/j.ejmech.2007.10.015>.
- 1266 [81] E.N. da Silva Júnior, M.A.B.F. de Moura, A. V. Pinto, M. do C.F.R. Pinto,  
1267 M.C.B.V. de Souza, A.J. Araújo, C. Pessoa, L. V. Costa-Lotufo, R.C.  
1268 Montenegro, M.O. de Moraes, V.F. Ferreira, M.O.F. Goulart, Cytotoxic,  
1269 trypanocidal activities and physicochemical parameters of nor- $\beta$ -lapachone-based  
1270 1,2,3-triazoles, *J. Braz. Chem. Soc.* 20 (2009) 635–643.  
1271 <https://doi.org/10.1590/s0103-50532009000400007>.
- 1272 [82] E.N. da Silva Júnior, I.M.M. de Melo, E.B.T. Diogo, V.A. Costa, J.D. de Souza  
1273 Filho, W.O. Valença, C.A. Camara, R.N. de Oliveira, A.S. de Araujo, F.S.  
1274 Emery, M.R. dos Santos, C.A. de Simone, R.F.S. Menna-Barreto, S.L. de Castro,  
1275 On the search for potential anti-*Trypanosoma cruzi* drugs: Synthesis and  
1276 biological evaluation of 2-hydroxy-3-methylamino and 1,2,3-triazolic  
1277 naphthoquinoidal compounds obtained by click chemistry reactions, *Eur. J. Med.*  
1278 *Chem.* 52 (2012) 304–312. <https://doi.org/10.1016/j.ejmech.2012.03.039>.
- 1279 [83] M.F.C. Cardoso, P.C. Rodrigues, M.E.I.M. Oliveira, I.L. Gama, I.M.C.B. da  
1280 Silva, I.O. Santos, D.R. Rocha, R.T. Pinho, V.F. Ferreira, M.C.B.V. de Souza,  
1281 F.D.C. da Silva, F.P. Silva-Jr, Synthesis and evaluation of the cytotoxic activity  
1282 of 1,2- furanonaphthoquinones tethered to 1,2,3-1H-triazoles in myeloid and  
1283 lymphoid leukemia cell lines, *Eur. J. Med. Chem.* 84 (2014) 708–717.  
1284 <https://doi.org/10.1016/j.ejmech.2014.07.079>.
- 1285 [84] G.A.M. Jardim, E.H.G. Cruz, W.O. Valença, J.M. Resende, B.L. Rodrigues, D.F.  
1286 Ramos, R.N. Oliveira, P.E.A. Silva, E.N. da Silva Júnior, On the search for  
1287 potential antimycobacterial drugs: Synthesis of naphthoquinoidal, phenazinic and  
1288 1,2,3-triazolic compounds and evaluation against *Mycobacterium tuberculosis*, *J.*  
1289 *Braz. Chem. Soc.* 26 (2015) 1013–1027. [https://doi.org/10.5935/0103-](https://doi.org/10.5935/0103-5053.20150067)  
1290 [5053.20150067](https://doi.org/10.5935/0103-5053.20150067).



- 1291 [85] F.S. dos Santos, G.G. Dias, R.P. de Freitas, L.S. Santos, G.F. de Lima, H.A.  
1292 Duarte, C.A. de Simone, L.M.S.L. Rezende, M.J.X. Vianna, J.R. Correa, B.A.D.  
1293 Neto, E.N. da Silva Júnior, Redox Center Modification of Lapachones towards  
1294 the Synthesis of Nitrogen Heterocycles as Selective Fluorescent Mitochondrial  
1295 Imaging Probes, *European J. Org. Chem.* 2017 (2017) 3763–3773.  
1296 <https://doi.org/10.1002/ejoc.201700227>.
- 1297 [86] S.B.B.B. Bahia, W.J. Reis, G.A.M. Jardim, F.T. Souto, C.A. de Simone, C.C.  
1298 Gatto, R.F.S. Menna-Barreto, S.L. de Castro, B.C. Cavalcanti, C. Pessoa, M.H.  
1299 Araujo, E.N. da Silva Júnior, Molecular hybridization as a powerful tool towards  
1300 multitarget quinoidal systems: Synthesis, trypanocidal and antitumor activities of  
1301 naphthoquinone-based 5-iodo-1,4-disubstituted-, 1,4- and 1,5-disubstituted-1,2,3-  
1302 triazoles, *Med. Chem. Commun.* 7 (2016) 1555–1563.  
1303 <https://doi.org/10.1039/c6md00216a>.
- 1304 [87] G.A.M. Jardim, D.J.B. Lima, W.O. Valença, D.J.B. Lima, B.C. Cavalcanti, C.  
1305 Pessoa, J. Rafique, A.L. Braga, C. Jacob, E.N. Da Silva Júnior, E.H.G. Da Cruz,  
1306 Synthesis of Selenium-Quinone Hybrid Compounds with Potential Antitumor  
1307 Activity via Rh-Catalyzed C-H Bond Activation and Click Reactions, *Molecules.*  
1308 23 (2018) 83. <https://doi.org/10.3390/molecules23010083>.
- 1309 [88] T.B. Gontijo, R.P. de Freitas, G.F. de Lima, L.C.D. de Rezende, L.F. Pedrosa,  
1310 T.L. Silva, M.O.F. Goulart, B.C. Cavalcanti, C. Pessoa, M.P. Bruno, J.R. Corrêa,  
1311 F.S. Emery, E.N. da Silva Júnior, Novel fluorescent lapachone-based BODIPY:  
1312 Synthesis, computational and electrochemical aspects, and subcellular  
1313 localisation of a potent antitumour hybrid quinone, *Chem. Commun.* 52 (2016)  
1314 13281–13284. <https://doi.org/10.1039/c6cc07054j>.
- 1315 [89] T.B. Gontijo, R.P. de Freitas, F.S. Emery, L.F. Pedrosa, J.B. Vieira Neto, B.C.  
1316 Cavalcanti, C. Pessoa, A. King, F. de Moliner, M. Vendrell, E.N. da Silva Júnior,  
1317 On the synthesis of quinone-based BODIPY hybrids: New insights on antitumor  
1318 activity and mechanism of action in cancer cells, *Bioorganic Med. Chem. Lett.*  
1319 27 (2017) 4446–4456. <https://doi.org/10.1016/j.bmcl.2017.08.007>.
- 1320 [90] W.O. Valença, T. V. Baiju, F.G. Brito, M.H. Araujo, C. Pessoa, B.C. Cavalcanti,  
1321 C.A. de Simone, C. Jacob, I.N.N. Namboothiri, E.N. da Silva Júnior, Synthesis of  
1322 Quinone-Based N-Sulfonyl-1,2,3-triazoles: Chemical Reactivity of Rh(II)  
1323 Azavinyl Carbenes and Antitumor Activity, *ChemistrySelect.* 2 (2017) 4301–  
1324 4308. <https://doi.org/10.1002/slct.201700885>.

- 1325 [91] E.B.T. Diogo, G.G. Dias, B.L. Rodrigues, T.T. Guimarães, W.O. Valença, C.A.  
1326 Camara, R.N. de Oliveira, M.G. da Silva, V.F. Ferreira, Y.G. de Paiva, M.O.F.  
1327 Goulart, R.F.S. Menna-Barreto, S.L. de Castro, E.N. da Silva Júnior, Synthesis  
1328 and anti-Trypanosoma cruzi activity of naphthoquinone-containing triazoles:  
1329 Electrochemical studies on the effects of the quinoidal moiety, *Bioorganic Med.*  
1330 *Chem.* 21 (2013) 6337–6348. <https://doi.org/10.1016/j.bmc.2013.08.055>.
- 1331 [92] V.N. Melo, W.M. Dantas, C.A. Camara, R.N. De Oliveira, Synthesis of 2,3-  
1332 unsaturated alkynyl O-glucosides from tri-O-acetyl-d-glucal by using  
1333 montmorillonite K-10/iron(III) chloride hexahydrate with subsequent copper(I)-  
1334 catalyzed 1,3-dipolar cycloaddition, *Synth.* 47 (2015) 3529–3541.  
1335 <https://doi.org/10.1055/s-0034-1378829>.
- 1336 [93] R.N. De Oliveira, A.L. De Xavier, B.M. Guimaraes, V.N.E. Melo, W.O.  
1337 Valença, W.S. Nascimento Do, P.L.F. Da Costa, C.A. Camara, Combining clays  
1338 and ultrasound irradiation for an o-acetylation reaction of N-glucopyranosyl and  
1339 other molecules, *J. Chil. Chem. Soc.* 59 (2014) 2610–2614.  
1340 <https://doi.org/10.4067/S0717-97072014000300018>.
- 1341 [94] Z. Cheng, W.O. Valença, G.G. Dias, J. Scott, N.D. Barth, F. de Moliner, G.B.P.  
1342 Souza, R.J. Mellanby, M. Vendrell, E.N. da Silva Júnior, Natural product-  
1343 inspired profluorophores for imaging NQO1 activity in tumour tissues,  
1344 *Bioorganic Med. Chem.* 27 (2019) 3938–3946.  
1345 <https://doi.org/10.1016/j.bmc.2019.07.017>.
- 1346 [95] V. V. Rostovtsev, L.G. Green, V. V. Fokin, K.B. Sharpless, A stepwise Huisgen  
1347 cycloaddition process: Copper(I)-catalyzed regioselective “ligation” of azides  
1348 and terminal alkynes, *Angew. Chemie - Int. Ed.* 41 (2002) 2596–2599.  
1349 [https://doi.org/10.1002/1521-3773\(20020715\)41:14<2596::AID-  
1350 ANIE2596>3.0.CO;2-4](https://doi.org/10.1002/1521-3773(20020715)41:14<2596::AID-ANIE2596>3.0.CO;2-4).
- 1351 [96] F. de Moliner, A. King, G.G. Dias, G.F. de Lima, C.A. de Simone, E.N. da Silva  
1352 Júnior, M. Vendrell, Quinone-derived  $\pi$ -extended phenazines as new fluorogenic  
1353 probes for live-cell imaging of lipid droplets, *Front. Chem.* 6 (2018) 339.  
1354 <https://doi.org/10.3389/fchem.2018.00339>.
- 1355 [97] R.S.F. Silva, M.B. De Amorim, M.D.C.F.R. Pinto, F.S. Emery, M.O.F. Goulart,  
1356 A. V. Pinto, Chemoselective oxidation of benzophenazines by m-CPBA: N-  
1357 oxidation vs. oxidative cleavage, *J. Braz. Chem. Soc.* 18 (2007) 759–764.  
1358 <https://doi.org/10.1590/S0103-50532007000400014>.

- 1359 [98] G.A.M. Jardim, W.X.C. Oliveira, R.P. de Freitas, R.F.S. Menna-Barreto, T.L.  
1360 Silva, M.O.F. Goulart, E.N. da Silva Júnior, Direct sequential C-H  
1361 iodination/organoyl-thiolation for the benzenoid A-ring modification of  
1362 quinonoid deactivated systems: A new protocol for potent trypanocidal quinones,  
1363 *Org. Biomol. Chem.* 16 (2018) 1686–1691. <https://doi.org/10.1039/c8ob00196k>.
- 1364 [99] R.G. Almeida, R.L. De Carvalho, M.P. Nunes, R.S. Gomes, L.F. Pedrosa, C.A.  
1365 De Simone, E. Gopi, V. Geertsen, E. Gravel, E. Doris, E.N. da Silva Júnior,  
1366 Carbon nanotube-ruthenium hybrid towards mild oxidation of sulfides to  
1367 sulfones: Efficient synthesis of diverse sulfonyl compounds, *Catal. Sci. Technol.*  
1368 9 (2019) 2742–2748. <https://doi.org/10.1039/c9cy00384c>.
- 1369 [100] G.A.M. Jardim, Í.A.O. Bozzi, W.X.C. Oliveira, C. Mesquita-Rodrigues, R.F.S.  
1370 Menna-Barreto, R.A. Kumar, E. Gravel, E. Doris, A.L. Braga, E.N. da Silva  
1371 Júnior, Copper complexes and carbon nanotube-copper ferrite-catalyzed  
1372 benzenoid A-ring selenation of quinones: An efficient method for the synthesis of  
1373 trypanocidal agents, *New J. Chem.* 43 (2019) 13751–13763.  
1374 <https://doi.org/10.1039/c9nj02026h>.
- 1375 [101] G.A.M. Jardim, J.F. Bower, E.N. da Silva Júnior, Rh-Catalyzed Reactions of 1,4-  
1376 Benzoquinones with Electrophiles: C-H Iodination, Bromination, and  
1377 Phenylselenation, *Org. Lett.* 18 (2016) 4454–4457.  
1378 <https://doi.org/10.1021/acs.orglett.6b01586>.
- 1379 [102] G.G. Dias, T.A. d. Nascimento, A.K.A. de Almeida, A.C.S. Bombaça, R.F.S.  
1380 Menna-Barreto, C. Jacob, S. Warratz, E.N. da Silva Júnior, L. Ackermann,  
1381 Ruthenium(II)-Catalyzed C–H Alkenylation of Quinones: Diversity-Oriented  
1382 Strategy for Trypanocidal Compounds, *European J. Org. Chem.* 2019 (2019)  
1383 2344–2353. <https://doi.org/10.1002/ejoc.201900004>.
- 1384 [103] S.N. Sunassee, C.G.L. Veale, N. Shunmoogam-Gounden, O. Osoniyi, D.T.  
1385 Hendricks, M.R. Caira, J.A. de La Mare, A.L. Edkins, A. V. Pinto, E.N. da Silva  
1386 Júnior, M.T. Davies-Coleman, Cytotoxicity of lapachol,  $\beta$ -lapachone and related  
1387 synthetic 1,4-naphthoquinones against oesophageal cancer cells, *Eur. J. Med.*  
1388 *Chem.* 62 (2013) 98–110. <https://doi.org/10.1016/j.ejmech.2012.12.048>.
- 1389 [104] T. Kumar, N. Satam, I.N.N. Namboothiri, Hauser–Kraus Annulation of  
1390 Phthalides with Nitroalkenes for the Synthesis of Fused and Spiro Heterocycles,  
1391 *European J. Org. Chem.* 2016 (2016) 3316–3321.  
1392 <https://doi.org/10.1002/ejoc.201600390>.

- 1393 [105] A. Suresh, T. V. Baiju, T. Kumar, I.N.N. Namboothiri, Synthesis of Spiro- and  
1394 Fused Heterocycles via (4+4) Annulation of Sulfonylphthalide with o-  
1395 Hydroxystyrenyl Derivatives, *J. Org. Chem.* 84 (2019) 3158–3168.  
1396 <https://doi.org/10.1021/acs.joc.8b03039>.
- 1397 [106] J.M. Wood, E.N. da Silva Júnior, J.F. Bower, Rh-Catalyzed [2 + 2 + 2]  
1398 Cycloadditions with Benzoquinones: De Novo Access to Naphthoquinones for  
1399 Lignan and Type II Polyketide Synthesis, *Org. Lett.* 22 (2020) 265–269.  
1400 <https://doi.org/10.1021/acs.orglett.9b04266>.
- 1401 [107] G.A.M. Jardim, E.N. da Silva Júnior, J.F. Bower, Overcoming naphthoquinone  
1402 deactivation: Rhodium-catalyzed C-5 selective C-H iodination as a gateway to  
1403 functionalized derivatives, *Chem. Sci.* 7 (2016) 3780–3784.  
1404 <https://doi.org/10.1039/c6sc00302h>.
- 1405 [108] W.J. Reis, Í.A.O. Bozzi, M.F. Ribeiro, P.C.B. Halicki, L.A. Ferreira, P.E.  
1406 Almeida da Silva, D.F. Ramos, C.A. de Simone, E.N. da Silva Júnior, Design of  
1407 hybrid molecules as antimycobacterial compounds: Synthesis of isoniazid-  
1408 naphthoquinone derivatives and their activity against susceptible and resistant  
1409 strains of *Mycobacterium tuberculosis*, *Bioorganic Med. Chem.* 27 (2019) 4143–  
1410 4150. <https://doi.org/10.1016/j.bmc.2019.07.045>.
- 1411 [109] K.C.G. Moura, P.F. Carneiro, M.D.C.F.R. Pinto, J.A. da Silva, V.R.S. Malta,  
1412 C.A. de Simone, G.G. Dias, G.A.M. Jardim, J. Cantos, T.S. Coelho, P.E.A. da  
1413 Silva, E.N. da Silva Jr., 1,3-Azoles from ortho-naphthoquinones: Synthesis of  
1414 aryl substituted imidazoles and oxazoles and their potent activity against  
1415 *Mycobacterium tuberculosis*, *Bioorganic Med. Chem.* 20 (2012) 6482–6488.  
1416 <https://doi.org/10.1016/j.bmc.2012.08.041>.
- 1417 [110] G.G. Dias, P.V.B. Pinho, H.A. Duarte, J.M. Resende, A.B.B. Rosa, J.R. Correa,  
1418 B.A.D. Neto, E.N. da Silva Júnior, Fluorescent oxazoles from quinones for  
1419 bioimaging applications, *RSC Adv.* 6 (2016) 76053–76063.  
1420 <https://doi.org/10.1039/c6ra14701a>.
- 1421 [111] G.G. Dias, B.L. Rodrigues, J.M. Resende, H.D.R. Calado, C.A. de Simone,  
1422 V.H.C. Silva, B.A.D. Neto, M.O.F. Goulart, F.R. Ferreira, A.S. Meira, C. Pessoa,  
1423 J.R. Correa, E.N. da Silva Júnior, Selective endocytic trafficking in live cells  
1424 with fluorescent naphthoxazoles and their boron complexes, *Chem. Commun.* 51  
1425 (2015) 9141–9144. <https://doi.org/10.1039/c5cc02383a>.
- 1426 [112] V. Grum-Tokars, K. Ratia, A. Begaye, S.C. Baker, A.D. Mesecar, Evaluating the

- 1427 3C-like protease activity of SARS-Coronavirus: Recommendations for  
1428 standardized assays for drug discovery, *Virus Res.* 133 (2008) 63–73.  
1429 <https://doi.org/10.1016/j.virusres.2007.02.015>.
- 1430 [113] H. xia Su, S. Yao, W. feng Zhao, M. jun Li, J. Liu, W. juan Shang, H. Xie, C.  
1431 qiang Ke, H. chen Hu, M. na Gao, K. qian Yu, H. Liu, J. shan Shen, W. Tang, L.  
1432 ke Zhang, G. fu Xiao, L. Ni, D. wen Wang, J. ping Zuo, H. liang Jiang, F. Bai, Y.  
1433 Wu, Y. Ye, Y. chun Xu, Anti-SARS-CoV-2 activities in vitro of  
1434 Shuanghuanglian preparations and bioactive ingredients, *Acta Pharmacol. Sin.* 41  
1435 (2020) 1167–1177. <https://doi.org/10.1038/s41401-020-0483-6>.
- 1436 [114] A.D. Mesecar, A taxonomically-driven approach to development of potent,  
1437 broad-spectrum inhibitors of coronavirus main protease including SARS-CoV-2  
1438 (COVID-19), *Be Publ.* (2020).
- 1439 [115] M. Bzówka, K. Mitusińska, A. Raczyńska, A. Samol, J.A. Tuszyński, A. Góra,  
1440 Structural and Evolutionary Analysis Indicate That the SARS-CoV-2 Mpro Is a  
1441 Challenging Target for Small-Molecule Inhibitor Design, *Int. J. Mol. Sci.* 21  
1442 (2020) 3099. <https://doi.org/10.3390/ijms21093099>.
- 1443 [116] D.W. Kneller, G. Phillips, H.M. O'Neill, R. Jedrzejczak, L. Stols, P. Langan, A.  
1444 Joachimiak, L. Coates, A. Kovalevsky, Structural plasticity of SARS-CoV-2 3CL  
1445 Mpro active site cavity revealed by room temperature X-ray crystallography, *Nat.*  
1446 *Commun.* 11 (2020) 1–6. <https://doi.org/10.1038/s41467-020-16954-7>.
- 1447 [117] A. Douangamath, D. Fearon, P. Gehrtz, T. Krojer, P. Lukacik, C.D. Owen, E.  
1448 Resnick, C. Strain-Damerell, A. Aimon, P. Ábrányi-Balogh, J. Brandão-Neto, A.  
1449 Carbery, G. Davison, A. Dias, T.D. Downes, L. Dunnett, M. Fairhead, J.D. Firth,  
1450 S.P. Jones, A. Keeley, G.M. Keserü, H.F. Klein, M.P. Martin, M.E.M. Noble, P.  
1451 O'Brien, A. Powell, R.N. Reddi, R. Skyner, M. Snee, M.J. Waring, C. Wild, N.  
1452 London, F. von Delft, M.A. Walsh, Crystallographic and electrophilic fragment  
1453 screening of the SARS-CoV-2 main protease, *Nat. Commun.* 11 (2020) 1–11.  
1454 <https://doi.org/10.1038/s41467-020-18709-w>.
- 1455 [118] D. Kuhn, N. Weskamp, S. Schmitt, E. Hüllermeier, G. Klebe, From the  
1456 Similarity Analysis of Protein Cavities to the Functional Classification of Protein  
1457 Families Using Cavbase, *J. Mol. Biol.* 359 (2006) 1023–1044.  
1458 <https://doi.org/10.1016/j.jmb.2006.04.024>.
- 1459 [119] L.S. Franco, R.C. Maia, E.J. Barreiro, Identification of LASSBio-1945 as an  
1460 inhibitor of SARS-CoV-2 main protease (MPRO) through in silico screening

- 1461 supported by molecular docking and a fragment-based pharmacophore model,  
1462 RSC Med. Chem. 12 (2021) 110–119. <https://doi.org/10.1039/D0MD00282H>.
- 1463 [120] J. Gossen, S. Albani, A. Hanke, B.P. Joseph, C. Bergh, M. Kuzikov, E. Costanzi,  
1464 C. Manelfi, P. Storici, P. Gribbon, A.R. Beccari, C. Talarico, F. Spyrakis, E.  
1465 Lindahl, A. Zaliani, P. Carloni, R.C. Wade, F. Musiani, D.B. Kokh, G. Rossetti,  
1466 A Blueprint for High Affinity SARS-CoV-2 Mpro Inhibitors from Activity-  
1467 Based Compound Library Screening Guided by Analysis of Protein Dynamics,  
1468 ACS Pharmacol. Transl. Sci. 4 (2021) 1079–1095.  
1469 <https://doi.org/10.1021/acscptsci.0c00215>.
- 1470 [121] B.L. Ho, S.C. Cheng, L. Shi, T.Y. Wang, K.I. Ho, C.Y. Chou, Critical  
1471 assessment of the important residues involved in the dimerization and catalysis of  
1472 MERS Coronavirus Main Protease, PLoS One. 10 (2015) e0144865.  
1473 <https://doi.org/10.1371/journal.pone.0144865>.
- 1474 [122] J. Ziebuhr, Molecular biology of severe acute respiratory syndrome coronavirus,  
1475 Curr. Opin. Microbiol. 7 (2004) 412–419.  
1476 <https://doi.org/10.1016/j.mib.2004.06.007>.
- 1477 [123] M. Jukič, J. Konc, S. Gobec, D. Janežič, Identification of Conserved Water Sites  
1478 in Protein Structures for Drug Design, J. Chem. Inf. Model. 57 (2017) 3094–  
1479 3103. <https://doi.org/10.1021/acs.jcim.7b00443>.
- 1480 [124] T.A. Halgren, R.B. Murphy, R.A. Friesner, H.S. Beard, L.L. Frye, W.T. Pollard,  
1481 J.L. Banks, Glide: A New Approach for Rapid, Accurate Docking and Scoring. 2.  
1482 Enrichment Factors in Database Screening, J. Med. Chem. 47 (2004) 1750–1759.  
1483 <https://doi.org/10.1021/jm030644s>.
- 1484 [125] O. Trott, A.J. Olson, AutoDock Vina: Improving the speed and accuracy of  
1485 docking with a new scoring function, efficient optimization, and multithreading,  
1486 J. Comput. Chem. 31 (2009) NA-NA. <https://doi.org/10.1002/jcc.21334>.
- 1487 [126] M. Miczi, M. Golda, B. Kunkli, T. Nagy, J. Tózsér, J.A. Mótyán, Identification  
1488 of host cellular protein substrates of sars-cov-2 main protease, Int. J. Mol. Sci. 21  
1489 (2020) 1–19. <https://doi.org/10.3390/ijms21249523>.
- 1490 [127] S.L. McGovern, B.T. Helfand, B. Feng, B.K. Shoichet, A specific mechanism of  
1491 nonspecific inhibition, J. Med. Chem. 46 (2003) 4265–4272.  
1492 <https://doi.org/10.1021/jm030266r>.
- 1493 [128] B.Y. Feng, B.K. Shoichet, A detergent-based assay for the detection of  
1494 promiscuous inhibitors, Nat. Protoc. 1 (2006) 550–553.

- 1495 <https://doi.org/10.1038/nprot.2006.77>.
- 1496 [129] A. Jadhav, R.S. Ferreira, C. Klumpp, B.T. Mott, C.P. Austin, J. Inglese, C.J.  
1497 Thomas, D.J. Maloney, B.K. Shoichet, A. Simeonov, Quantitative analyses of  
1498 aggregation, autofluorescence, and reactivity artifacts in a screen for inhibitors of  
1499 a thiol protease, *J. Med. Chem.* 53 (2010) 37–51.  
1500 <https://doi.org/10.1021/jm901070c>.
- 1501 [130] S.L. McGovern, E. Caselli, N. Grigorieff, B.K. Shoichet, A common mechanism  
1502 underlying promiscuous inhibitors from virtual and high-throughput screening, *J.*  
1503 *Med. Chem.* 45 (2002) 1712–1722. <https://doi.org/10.1021/jm010533y>.
- 1504 [131] P.D. Boudreau, B.W. Miller, L.I. McCall, J. Almaliti, R. Reher, K. Hirata, T. Le,  
1505 J.L. Siqueira-Neto, V. Hook, W.H. Gerwick, Design of Gallinamide A Analogs  
1506 as Potent Inhibitors of the Cysteine Proteases Human Cathepsin L and  
1507 *Trypanosoma cruzi* Cruzain, *J. Med. Chem.* 62 (2019) 9026–9044.  
1508 <https://doi.org/10.1021/acs.jmedchem.9b00294>.
- 1509 [132] R. Hilgenfeld, From SARS to MERS: crystallographic studies on coronaviral  
1510 proteases enable antiviral drug design, *FEBS J.* 281 (2014) 4085–4096.  
1511 <https://doi.org/10.1111/febs.12936>.
- 1512 [133] J.B. Baell, G.A. Holloway, New substructure filters for removal of pan assay  
1513 interference compounds (PAINS) from screening libraries and for their exclusion  
1514 in bioassays, *J. Med. Chem.* 53 (2010) 2719–2740.  
1515 <https://doi.org/10.1021/jm901137j>.
- 1516 [134] J. Lee, L.J. Worrall, M. Vuckovic, F.I. Rosell, F. Gentile, A.T. Ton, N.A.  
1517 Caveney, F. Ban, A. Cherkasov, M. Paetzel, N.C.J. Strynadka, Crystallographic  
1518 structure of wild-type SARS-CoV-2 main protease acyl-enzyme intermediate  
1519 with physiological C-terminal autoprocessing site, *Nat. Commun.* 11 (2020) 1–9.  
1520 <https://doi.org/10.1038/s41467-020-19662-4>.
- 1521 [135] R. Hilgenfeld, K. Anand, J.R. Mesters, Z. Rao, X. Shen, H. Jiang, J. Tan, K.H.G.  
1522 Verschueren, Structure and dynamics of SARS coronavirus main proteinase (M  
1523 pro), in: *Adv. Exp. Med. Biol.*, Springer, 2006: pp. 585–591.  
1524 [https://doi.org/10.1007/978-0-387-33012-9\\_106](https://doi.org/10.1007/978-0-387-33012-9_106).
- 1525 [136] B. Goyal, D. Goyal, Targeting the Dimerization of the Main Protease of  
1526 Coronaviruses: A Potential Broad-Spectrum Therapeutic Strategy, *ACS Comb.*  
1527 *Sci.* 22 (2020) 297–305. <https://doi.org/10.1021/acscombsci.0c00058>.
- 1528 [137] S. Chen, L. Chen, J. Tan, J. Chen, L. Du, T. Sun, J. Shen, K. Chen, H. Jiang, X.

- 1529 Shen, Severe acute respiratory syndrome coronavirus 3C-like proteinase N  
1530 terminus is indispensable for proteolytic activity but not for enzyme  
1531 dimerization: Biochemical and thermodynamic investigation in conjunction with  
1532 molecular dynamics simulations, *J. Biol. Chem.* 280 (2005) 164–173.  
1533 <https://doi.org/10.1074/jbc.M408211200>.
- 1534 [138] D. Suárez, N. Díaz, SARS-CoV-2 main protease: a molecular dynamics study, *J.*  
1535 *Chem. Inf. Model.* (2020).
- 1536 [139] S. Hattori, N. Higashi-Kuwata, H. Hayashi, S.R. Allu, J. Raghavaiah, H. Bulut,  
1537 D. Das, B.J. Anson, E.K. Lendy, Y. Takamatsu, N. Takamune, N. Kishimoto, K.  
1538 Murayama, K. Hasegawa, M. Li, D.A. Davis, E.N. Kodama, R. Yarchoan, A.  
1539 Wlodawer, S. Misumi, A.D. Mesecar, A.K. Ghosh, H. Mitsuya, A small  
1540 molecule compound with an indole moiety inhibits the main protease of SARS-  
1541 CoV-2 and blocks virus replication, *Nat. Commun.* 12 (2021) 1–12.  
1542 <https://doi.org/10.1038/s41467-021-20900-6>.
- 1543 [140] W.M. Singh, J.B. Baruah, Synthesis of mixed aryl 2,3-diarylsulphonyl-1,4-  
1544 naphthoquinones, *Synth. Commun.* 39 (2009) 1433–1442.  
1545 <https://doi.org/10.1080/00397910802528951>.
- 1546 [141] J. Qiao, Y.S. Li, R. Zeng, F.L. Liu, R.H. Luo, C. Huang, Y.F. Wang, J. Zhang, B.  
1547 Quan, C. Shen, X. Mao, X. Liu, W. Sun, W. Yang, X. Ni, K. Wang, L. Xu, Z.L.  
1548 Duan, Q.C. Zou, H.L. Zhang, W. Qu, Y.H.P. Long, M.H. Li, R.C. Yang, X. Liu,  
1549 J. You, Y. Zhou, R. Yao, W.P. Li, J.M. Liu, P. Chen, Y. Liu, G.F. Lin, X. Yang,  
1550 J. Zou, L. Li, Y. Hu, G.W. Lu, W.M. Li, Y.Q. Wei, Y.T. Zheng, J. Lei, S. Yang,  
1551 SARS-CoV-2 Mpro inhibitors with antiviral activity in a transgenic mouse  
1552 model, *Science* (80-. ). 371 (2021) 1374–1378.  
1553 <https://doi.org/10.1126/science.abf1611originally>.
- 1554 [142] D.J.B. Lima, R.G. Almeida, G.A.M. Jardim, B.P.A. Barbosa, A.C.C. Santos,  
1555 W.O. Valença, M.R. Scheide, C.C. Gatto, G.G.C. de Carvalho, P.M.S. Costa, C.  
1556 Pessoa, C.L.M. Pereira, C. Jacob, A.L. Braga, E.N. da Silva Júnior, It takes two  
1557 to tango: synthesis of cytotoxic quinones containing two redox active centers  
1558 with potential antitumor activity, *RSC Med. Chem.* (2021).  
1559 <https://doi.org/10.1039/d1md00168j>.
- 1560 [143] H.M. Berman, J. Westbrook, Z. Feng, G. Gilliland, T.N. Bhat, H. Weissig, I.N.  
1561 Shindyalov, P.E. Bourne, The Protein Data Bank, *Nucleic Acids Res.* 28 (2000)  
1562 235–242. <https://doi.org/10.1093/nar/28.1.235>.



- 1563 [144] Core R Team, A Language and Environment for Statistical Computing, R Found.  
1564 Stat. Comput. 2 (2019) <https://www.R-project.org>. <http://www.r-project.org>.
- 1565 [145] B.J. Grant, A.P.C. Rodrigues, K.M. ElSawy, J.A. McCammon, L.S.D. Caves,  
1566 Bio3d: an R package for the comparative analysis of protein structures,  
1567 Bioinformatics. 22 (2006) 2695–2696.
- 1568 [146] W.L. Delano, The PyMOL Molecular Graphics System, (2002).  
1569 <http://www.pymol.org>.
- 1570 [147] K. Zhu, K.W. Borrelli, J.R. Greenwood, T. Day, R. Abel, R.S. Farid, E. Harder,  
1571 Docking covalent inhibitors: A parameter free approach to pose prediction and  
1572 scoring, J. Chem. Inf. Model. 54 (2014) 1932–1940.  
1573 <https://doi.org/10.1021/ci500118s>.
- 1574 [148] W. Sherman, T. Day, M.P. Jacobson, R.A. Friesner, R. Farid, Novel procedure  
1575 for modeling ligand/receptor induced fit effects, J. Med. Chem. 49 (2006) 534–  
1576 553. <https://doi.org/10.1021/jm050540c>.
- 1577 [149] K.J. Bowers, D.E. Chow, H. Xu, R.O. Dror, M.P. Eastwood, B.A. Gregersen, J.L.  
1578 Klepeis, I. Kolossvary, M.A. Moraes, F.D. Sacerdoti, J.K. Salmon, Y. Shan, D.E.  
1579 Shaw, Scalable Algorithms for Molecular Dynamics Simulations on Commodity  
1580 Clusters, in: SC '06 Proc. 2006 ACM/IEEE Conf. Supercomput., 2007: pp. 43–  
1581 43. <https://doi.org/10.1109/sc.2006.54>.
- 1582 [150] E. Harder, W. Damm, J. Maple, C. Wu, M. Reboul, J.Y. Xiang, L. Wang, D.  
1583 Lupyan, M.K. Dahlgren, J.L. Knight, J.W. Kaus, D.S. Cerutti, G. Krilov, W.L.  
1584 Jorgensen, R. Abel, R.A. Friesner, OPLS3: A Force Field Providing Broad  
1585 Coverage of Drug-like Small Molecules and Proteins, J. Chem. Theory Comput.  
1586 12 (2016) 281–296. <https://doi.org/10.1021/acs.jctc.5b00864>.
- 1587 [151] G.M. Ferreira, T. Kronenberger, A.K. Tonduru, R.D.C. Hirata, M.H. Hirata, A.  
1588 Poso, SARS-COV-2 Mpro conformational changes induced by covalently bound  
1589 ligands, J. Biomol. Struct. Dyn. (2021) 1–11.  
1590 <https://doi.org/10.1080/07391102.2021.1970626>.
- 1591 [152] W.L. Jorgensen, J. Chandrasekhar, J.D. Madura, R.W. Impey, M.L. Klein,  
1592 Comparison of simple potential functions for simulating liquid water, J. Chem.  
1593 Phys. 79 (1983) 926–935. <https://doi.org/10.1063/1.445869>.
- 1594 [153] T. Darden, D. York, L. Pedersen, Particle mesh Ewald: An  $N \cdot \log(N)$  method for  
1595 Ewald sums in large systems, J. Chem. Phys. 98 (1993) 10089–10092.  
1596 <https://doi.org/10.1063/1.464397>.

1597 [154] A.S. Ashhurst, A.H. Tang, P. Fajtová, M. Yoon, A. Aggarwal, A. Stoye, M.  
1598 Larance, L. Beretta, A. Drelich, D. Skinner, L. Li, T.D. Meek, J.H. McKerrow,  
1599 V. Hook, C.-T.K. Tseng, S. Turville, W.H. Gerwick, A.J. O'Donoghue, R.J.  
1600 Payne, Potent in vitro anti-SARS-CoV-2 activity by gallinamide A and analogues  
1601 via inhibition of cathepsin L., *BioRxiv Prepr. Serv. Biol.* (2020).  
1602 <https://doi.org/10.1101/2020.12.23.424111>.  
1603
